# Supplementary material for: Artificial intelligence in STEM education: a transdisciplinary framework for engagement and innovation
Source: Frontiers journal article supplement (doi:10.3389/feduc.2025.1619888), 2025-07-09
Supplement: Table_2.xls [file Table_2.xls]

## Sheet: savedrecs
Publication Type	Authors	Book Authors	Book Editors	Book Group Authors	Author Full Names	Book Author Full Names	Group Authors	Article Title	Source Title	Book Series Title	Book Series Subtitle	Language	Document Type	Conference Title	Conference Date	Conference Location	Conference Sponsor	Conference Host	Author Keywords	Keywords Plus	Abstract	Addresses	Affiliations	Reprint Addresses	Email Addresses	Researcher Ids	ORCIDs	Funding Orgs	Funding Name Preferred	Funding Text	Cited References	Cited Reference Count	Times Cited, WoS Core	Times Cited, All Databases	180 Day Usage Count	Since 2013 Usage Count	Publisher	Publisher City	Publisher Address	ISSN	eISSN	ISBN	Journal Abbreviation	Journal ISO Abbreviation	Publication Date	Publication Year	Volume	Issue	Part Number
C	Tugui, A; Agheorghiesei, DT; Zelinschi, DO; Scripcariu, DV			IEEE	Tugui, Alexandru; Agheorghiesei, Daniela-Tatiana; Zelinschi, Denisa-Oana; Scripcariu, Dragos-Viorel			Integrating Digital DNA for AI's Entities: Advancing Ethical AI Frameworks in the Altug Scenario	2024 SECOND INTERNATIONAL CONFERENCE ON INTELLIGENT CYBER PHYSICAL SYSTEMS AND INTERNET OF THINGS, ICOICI 2024					2nd International Conference on Intelligent Cyber Physical Systems and Internet of Things (ICoICI)	AUG 28-30, 2024	JCT Coll Engn & Technol, Coimbatore, INDIA	IEEE,IEEE Madras Sect,Sambhram Univ,Univ Cagliari, Departimento Ingegneria Elettrica Elettronica	JCT Coll Engn & Technol								Scripcariu, Dragoș-Viorel/ITU-2735-2023; Agheorghiesei (Corodeanu), Daniela-Tatiana/AAB-4197-2022; Zelinschi, Denisa/LWK-5237-2024; TUGUI, Alexandru/D-5939-2012	TUGUI, Alexandru/0000-0001-8689-337X															979-8-3315-4066-1; 979-8-3315-4067-8				2024
J	Lamberti, PM; Bombaerts, G; Ijsselsteijn, W				Lamberti, Pablo Muruzabal; Bombaerts, Gunter; Ijsselsteijn, Wijnand			Mind the gap: bridging the divide between computer scientists and ethicists in shaping moral machines	ETHICS AND INFORMATION TECHNOLOGY																	; Bombaerts, Gunter/IZE-1103-2023	IJsselsteijn, Wijnand/0000-0001-6856-9269; Bombaerts, Gunter/0000-0002-8006-1617													1388-1957	1572-8439				MAR	2025	27	1
J	Heinrichs, H				Heinrichs, Harald			Sustainability Science with Ozzy Osbourne, Julia Roberts and Ai Weiwei The Potential of Arts-Based Research for Sustainable Development	GAIA-ECOLOGICAL PERSPECTIVES FOR SCIENCE AND SOCIETY																															0940-5550	2625-5413					2018	27	1
J	Harshbarger, SD; Heckle, RR				Harshbarger, Stuart D.; Heckle, Rosa R.			Transitioning Science to Practice	INSIGHT																															1354-2575	1754-4904				APR	2024	27	2
J	Cai, YZ; Ferrer, BR; Lastra, JLM				Cai, Yuzhuo; Ferrer, Borja Ramis; Lastra, Jose Luis Martinez			Building University-Industry Co-Innovation Networks in Transnational Innovation Ecosystems: Towards a Transdisciplinary Approach of Integrating Social Sciences and Artificial Intelligence	SUSTAINABILITY																	Martinez Lastra, Jose Luis/G-4273-2014; Cai, Yuzhuo/I-2908-2013	Martinez Lastra, Jose Luis/0000-0001-6227-3408; Cai, Yuzhuo/0000-0002-7934-3828; Ramis Ferrer, Borja/0000-0002-0525-163X														2071-1050				SEP 1	2019	11	17
C	Schlicht, L; Melzer, M; Roesler, U; Voss, S; Vock, S			ASME	Schlicht, Larissa; Melzer, Marlen; Roesler, Ulrike; Voss, Stefan; Vock, Silvia			AN INTEGRATIVE AND TRANSDISCIPLINARY APPROACH FOR A HUMAN-CENTERED DESIGN OF AI-BASED WORK SYSTEMS	PROCEEDINGS OF ASME 2021 INTERNATIONAL MECHANICAL ENGINEERING CONGRESS AND EXPOSITION (IMECE2021), VOL 13					ASME International Mechanical Engineering Congress and Exposition (IMECE)	NOV 01-05, 2021	ELECTR NETWORK	Amer Soc Mech Engineers									Schlicht, Larissa/JGD-7594-2023; Voß, Stefan/K-6655-2019; Vock, Silvia/KHE-2784-2024																978-0-7918-8569-7				2021
J	Lotz, JC; Ropella, G; Anderson, P; Yang, Q; Hedderich, MA; Bailey, J; Hunt, CA				Lotz, Jeffrey C.; Ropella, Glen; Anderson, Paul; Yang, Qian; Hedderich, Michael A.; Bailey, Jeannie; Hunt, C. Anthony			An exploration of knowledge-organizing technologies to advance transdisciplinary back pain research	JOR SPINE																		Hunt, C. Anthony/0000-0001-9372-6860													2572-1143					DEC	2023	6	4
J	Ilesan, RR; Stefaniga, SA; Flesar, R; Beyer, M; Ginghina, E; Pestean, AS; Hirsch, MC; Perju-Dumbrava, L; Faragó, P				Ilesan, Robert Radu; Stefaniga, Sebastian-Aurelian; Flesar, Radu; Beyer, Michel; Ginghina, Elena; Pestean, Ana Sorina; Hirsch, Martin C.; Perju-Dumbrava, Lacramioara; Farago, Paul			In Silico Decoding of Parkinson's: Speech & Writing Analysis	JOURNAL OF CLINICAL MEDICINE																	ilesan, robert/HMD-3977-2023; Perju-Dumbrava, Lacramioara/LFT-3757-2024; Farago, Paul/AAJ-7212-2020; Flesar, Radu/LNP-8056-2024; Sebastian, Stefaniga/U-8198-2019	Stefaniga, Sebastian-Aurelian/0000-0002-6211-9205; Hirsch, Martin Christian/0000-0003-3268-4921; Farago, Paul/0000-0001-7824-8506														2077-0383				SEP	2024	13	18
J	Roco, MC				Roco, Mihail C.			Principles of convergence in nature and society and their application: from nanoscale, digits, and logic steps to global progress	JOURNAL OF NANOPARTICLE RESEARCH																															1388-0764	1572-896X				OCT 22	2020	22	11
J	Bernasconi, C; Blume, LB				Bernasconi, Claudia; Blume, Libby Balter			Theorizing architectural research and practice in the metaverse: the meta-context of virtual community engagement	ARCHNET-IJAR INTERNATIONAL JOURNAL OF ARCHITECTURAL RESEARCH																		Bernasconi, Claudia/0000-0002-0114-5039													2631-6862	1938-7806				MAR 21	2025	19	1
J	Karaca, Y; Baleanu, D; Moonis, M; Zhang, YD; Gervasi, O				Karaca, Yeliz; Baleanu, Dumitru; Moonis, Majaz; Zhang, Yu-dong; Gervasi, Osvaldo			EDITORIAL SPECIAL ISSUE: PART IV-III-II-I SERIES - FRACTALS-FRACTIONAL AI-BASED ANALYSES AND APPLICATIONS TO COMPLEX SYSTEMS finestre of creativity, complexity and universality…	FRACTALS-COMPLEX GEOMETRY PATTERNS AND SCALING IN NATURE AND SOCIETY																	Zhang, Yudong/I-7633-2013; Baleanu, Dumitru/B-9936-2012; Karaca, Yeliz/W-1525-2019; Gervasi, Osvaldo/AAH-2792-2019	Karaca, Yeliz/0000-0001-8725-6719													0218-348X	1793-6543					2023	31	10
[truncated: 22 more columns]
