# Supplementary material for: Artificial intelligence in STEM education: a transdisciplinary framework for engagement and innovation
Source: Frontiers journal article supplement (doi:10.3389/feduc.2025.1619888), 2025-07-09
Supplement: Table_4.xls [file Table_4.xls]

## Sheet: savedrecs
Publication Type	Authors	Book Authors	Book Editors	Book Group Authors	Author Full Names	Book Author Full Names	Group Authors	Article Title	Source Title	Book Series Title	Book Series Subtitle	Language	Document Type	Conference Title	Conference Date	Conference Location	Conference Sponsor	Conference Host	Author Keywords	Keywords Plus	Abstract	Addresses	Affiliations	Reprint Addresses	Email Addresses	Researcher Ids	ORCIDs	Funding Orgs	Funding Name Preferred	Funding Text	Cited References	Cited Reference Count	Times Cited, WoS Core	Times Cited, All Databases	180 Day Usage Count	Since 2013 Usage Count	Publisher	Publisher City	Publisher Address	ISSN	eISSN	ISBN	Journal Abbreviation	Journal ISO Abbreviation	Publication Date	Publication Year	Volume	Issue	Part Number
J	Da'Costa, A; Teke, J; Origbo, JE; Osonuga, A; Egbon, E; Olawade, DB				Da'Costa, Adebayo; Teke, Jennifer; Origbo, Joseph E.; Osonuga, Ayokunle; Egbon, Eghosasere; Olawade, David B.			AI-driven triage in emergency departments: A review of benefits, challenges, and future directions	INTERNATIONAL JOURNAL OF MEDICAL INFORMATICS																	Olawade, David/AAF-9929-2021														1386-5056	1872-8243				MAY	2025	197
J	Benmalek, M; Seddiki, A; Haouam, KD				Benmalek, Mourad; Seddiki, Abdessamed; Haouam, Kamel-Dine			SNN-IoMT: A Novel AI-Driven Model for Intrusion Detection in Internet of Medical Things	CMES-COMPUTER MODELING IN ENGINEERING & SCIENCES																	Benmalek, Mourad/GXM-9011-2022														1526-1492	1526-1506				2025 APR 1	2025
J	Mzwri, K; Turcsányi-Szabo, M				Mzwri, Kovan; Turcsanyi-Szabo, Marta			The Impact of Prompt Engineering and a Generative AI-Driven Tool on Autonomous Learning: A Case Study	EDUCATION SCIENCES																	Mzwri, Kovan/JQW-7894-2023; Turcsanyi-Szabo, Marta/M-3809-2017	Mzwri, Kovan/0000-0001-6880-2796; Turcsanyi-Szabo, Marta/0000-0002-8962-1959														2227-7102				FEB	2025	15	2
J	Gulhane, M; Sajana, T; Patil, NS				Gulhane, Monali; Sajana, T.; Patil, Nitin S.			Analyzing the impact of AI-driven diagnostic tools on healthcare policy and resource allocation	JOURNAL OF KRISHNA INSTITUTE OF MEDICAL SCIENCES UNIVERSITY																	Patil, Nitin/AGU-6385-2022														2231-4261					JUL-SEP	2024	13	3
J	Schwalbe, N; Wahl, B				Schwalbe, Nina; Wahl, Brian			Artificial intelligence and the future of global health	LANCET																															0140-6736	1474-547X				MAY 16	2020	395	10236
C	Narigina, M; Romanovs, A; Merkuryev, Y		Grabis, J; Romanovs, A; Narigina, M		Narigina, Marta; Romanovs, Andrejs; Merkuryev, Yuri			A Review of AI-Driven Digital Twin Frameworks for Cardiovascular Disease Diagnosis and Management	2024 IEEE 65TH INTERNATIONAL SCIENTIFIC CONFERENCE ON INFORMATION TECHNOLOGY AND MANAGEMENT SCIENCE OF RIGA TECHNICAL UNIVERSITY, ITMS 2024	International Scientific Conference on Information Technology and Management Science of Riga Technical University				65th International Scientific Conference on Information Technology and Management Science	OCT 03-04, 2024	Riga, LATVIA	Riga Technical University									Romanovs, Andrejs/AAE-4524-2021; Narigina, Marta/MGB-3075-2025	Narigina, Marta/0000-0001-8678-6101													2771-6953		979-8-3315-3384-7; 979-8-3315-3383-0				2024
J	Allil, K				Allil, Kamaal			Integrating AI-driven marketing analytics techniques into the classroom: pedagogical strategies for enhancing student engagement and future business success	JOURNAL OF MARKETING ANALYTICS																	Allil, Kamaal/X-5302-2019	Allil, Kamaal/0000-0001-5466-6519													2050-3318	2050-3326				JUN	2024	12	2
J	Okpete, UE; Byeon, H				Okpete, Uchenna Esther; Byeon, Haewon			Challenges and prospects in bridging precision medicine and artificial intelligence in genomic psychiatric treatment	WORLD JOURNAL OF PSYCHIATRY																															2220-3206					AUG 19	2024	14	8
J	Yablonsky, S				Yablonsky, Sergey			AI-driven platform enterprise maturity: from human led to machine governed	KYBERNETES																	Yablonsky, Sergey/ISU-0829-2023; Yablonsky, Sergey/K-8118-2013	Yablonsky, Sergey/0000-0001-9727-534X													0368-492X	1758-7883				OCT 29	2021	50	10
C	Anagnostopoulou, E; Grammatikos, NA; Apostolou, D; Mentzas, G			ASSOC COMPUTING MACHINERY	Anagnostopoulou, Evangelia; Grammatikos, Nikolaos Antonios; Apostolou, Dimitris; Mentzas, Gregoris			Trustworthy AI in education: A Roadmap for Ethical and Effective Implementation	PROCEEDINGS OF THE 13TH HELLENIC CONFERENCE ON ARTIFICIAL INTELLIGENCE, SETN 2024					13th Hellenic Conference on Artificial Intelligence	SEP 11-13, 2024	Piraeus, GREECE										Apostolou, Dimitris/AAW-5404-2020	Apostolou, Dimitris/0000-0002-5815-8033															979-8-4007-0982-1				2024
J	Ali, M				Ali, Majid			Will AI reshape or deform pharmacy education?	CURRENTS IN PHARMACY TEACHING AND LEARNING																															1877-1297	1877-1300				MAR	2025	17	3
J	Twabu, K; Nakene-Mginqi, M				Twabu, Khanyisile; Nakene-Mginqi, Mathabo			Developing a design thinking artificial intelligence driven auto-marking/grading system for assessments to reduce the workload of lecturers at a higher learning institution in South Africa	FRONTIERS IN EDUCATION																	Twabu, Khanyisile/MFJ-0323-2025															2504-284X				DEC 17	2024	9
C	Singh, S			IEEE COMPUTER SOC	Singh, Satpreet			Leadership Challenges and Strategies in the Era of AI Transformation	2023 INTERNATIONAL CONFERENCE ON COMPUTATIONAL SCIENCE AND COMPUTATIONAL INTELLIGENCE, CSCI 2023	International Conference on Computational Science and Computational Intelligence				International Conference on Computational Science and Computational Intelligence (CSCI)	DEC 13-15, 2023	Las Vegas, NV	IEEE																							2769-5670		979-8-3503-6151-3; 979-8-3503-7230-4				2023
J	Nopas, DS				Nopas, Dech-siri			Algorithmic learning or learner autonomy? Rethinking AI's role in digital education	QUALITATIVE RESEARCH JOURNAL																	Nopas, Dechsiri/KFQ-4616-2024														1443-9883	1448-0980				2025 APR 15	2025
J	Ali, S; Wang, J; Leung, VCM				Ali, Sijjad; Wang, Jia; Leung, Victor Chung Ming			AI-driven fusion with cybersecurity: Exploring current trends, advanced techniques, future directions, and policy implications for evolving paradigms- A comprehensive review	INFORMATION FUSION																	khuhro, Sijjad/AAF-5124-2020; Leung, Victor/AGU-2462-2022	Ali, SIJJAD/0000-0002-9141-8837													1566-2535	1872-6305				JUN	2025	118
J	Dierickx, L; Opdahl, AL; Khan, SA; Lindén, CG; Rojas, DCG				Dierickx, Laurence; Opdahl, Andreas Lothe; Khan, Sohail Ahmed; Linden, Carl-Gustav; Guerrero Rojas, Diana Carolina			A data-centric approach for ethical and trustworthy AI in journalism	ETHICS AND INFORMATION TECHNOLOGY																	Khan, Sohail Ahmed/HGC-4747-2022; Dierickx, Laurence/ABU-5786-2022; Opdahl, Andreas/B-5508-2015	Dierickx, Laurence/0000-0001-5926-8720; Khan, Sohail Ahmed/0000-0001-5351-2278; Opdahl, Andreas L/0000-0002-3141-1385													1388-1957	1572-8439				DEC	2024	26	4
J	Mohamed, YA; Khanan, A; Bashir, M; Mohamed, AHHM; Adiel, MAE; Elsadig, MA				Mohamed, Yasir Abdelgadir; Khanan, Akbar; Bashir, Mohamed; Mohamed, Abdul Hakim H. M.; Adiel, Mousab A. E.; Elsadig, Muawia A.			The Impact of Artificial Intelligence on Language Translation: A Review	IEEE ACCESS																	AbdelgadirMohamed, Yasir/GMW-4662-2022; Khanan, Akbar/AAK-1059-2020; Bashir, Mohammed/M-1965-2018; Mohamed, Abdul Hakim H M/ABH-1980-2020; ADIEL, MOUSAB/AAV-4150-2020; Elsadig, Muawia/A-4724-2015	Mohamed, Abdul Hakim H M/0000-0001-5879-5385; ADIEL, MOUSAB/0000-0002-9207-0035; Elsadig, Muawia/0000-0002-2622-6724													2169-3536						2024	12
J	Sayyed, H				Sayyed, Hifajatali			Artificial intelligence and criminal liability in India: exploring legal implications and challenges	COGENT SOCIAL SCIENCES																	Sayyed, Hifajatali/HLX-0878-2023	Sayyed, Hifajatali/0000-0001-9472-6950													2331-1886					DEC 31	2024	10	1
J	Fathima, M; Moulana, M				Fathima, Maleeha; Moulana, Mohammed			Revolutionizing Breast Cancer Care: AI-Enhanced Diagnosis and Patient History	COMPUTER METHODS IN BIOMECHANICS AND BIOMEDICAL ENGINEERING																	Fathima, Maleeha/JYE-9153-2024; mohammed, moulana/U-6754-2018	Fathima, Maleeha/0000-0002-2264-0709													1025-5842	1476-8259				APR 4	2025	28	5
J	Rammal, DS; Alomar, M; Palaian, S				Rammal, Dania Saad; Alomar, Muaed; Palaian, Subish			AI-Driven pharmacy practice: Unleashing the revolutionary potential in medication management, pharmacy workflow, and patient care	PHARMACY PRACTICE-GRANADA																	Palaian, Subish/AAU-1424-2020														1885-642X	1886-3655				APR-JUN	2024	22	2
J	Petrusic, I; Chiang, CC; Garcia-Azorin, D; Ha, WS; Ornello, R; Pellesi, L; Rubio-Beltrán, E; Ruscheweyh, R; Waliszewska-Prosol, M; Wells-Gatnik, W				Petrusic, Igor; Chiang, Chia-Chun; Garcia-Azorin, David; Ha, Woo-Seok; Ornello, Raffaele; Pellesi, Lanfranco; Rubio-Beltran, Eloisa; Ruscheweyh, Ruth; Waliszewska-Prosol, Marta; Wells-Gatnik, William			Influence of next-generation artificial intelligence on headache research, diagnosis and treatment: the junior editorial board members' vision - part 2	JOURNAL OF HEADACHE AND PAIN																	Ha, WooSeok/LYO-2690-2024; Waliszewska-Prosół, Marta/ABI-5707-2020; García-Azorín, David/AAB-3613-2019; Pellesi, Lanfranco/J-9780-2019; Petrusic, Igor/AAS-4070-2021; Ornello, Raffaele/AAS-6876-2020	Rubio Beltran, Amada Eloisa/0000-0002-2912-3632; Ha, Woo-Seok/0000-0003-1188-449X													1129-2369	1129-2377				JAN 2	2025	26	1
J	Touis, T; Tagdimi, Z; Aammou, S				Touis, Tarik; Tagdimi, Zakaria; Aammou, Souhaib			ENHANCING SOCIO-PEDAGOGICAL ENGAGEMENT IN MOODLE THROUGH AI-DRIVEN PERSONALIZED LEARNING	CADERNOS EDUCACAO TECNOLOGIA E SOCIEDADE																	TAGDIMI, Zakaria/HMV-1835-2023; AAMMOU, Souhaib/F-1712-2014														2316-9907						2024	17
J	Kamoun, F; El Ayeb, W; Jabri, I; Sifi, S; Iqbal, F				Kamoun, Faouzi; El Ayeb, Walid; Jabri, Ibtissem; Sifi, Sami; Iqbal, Farkhund			EXPLORING STUDENTS' AND FACULTY'S KNOWLEDGE, ATTITUDES, AND PERCEPTIONS TOWARDS CHATGPT: A CROSS-SECTIONAL EMPIRICAL STUDY	JOURNAL OF INFORMATION TECHNOLOGY EDUCATION-RESEARCH																	Iqbal, Farkhund/AAH-8756-2020														1547-9714	1539-3585					2024	23
J	Al Zo'ubi, M				Al Zo'ubi, Mazen			Review of 2024 publications on the applications of artificial intelligence in rheumatology	CLINICAL RHEUMATOLOGY																															0770-3198	1434-9949				APR	2025	44	4
J	David-Olawade, AC; Olawade, DB; Vanderbloemen, L; Rotifa, OB; Fidelis, SC; Egbon, E; Akpan, AO; Adeleke, S; Ghose, A; Boussios, S				Clement David-Olawade, Aanuoluwapo; Olawade, David B.; Vanderbloemen, Laura; Rotifa, Oluwayomi B.; Fidelis, Sandra Chinaza; Egbon, Eghosasere; Akpan, Akwaowo Owoidighe; Adeleke, Sola; Ghose, Aruni; Boussios, Stergios			AI-Driven Advances in Low-Dose Imaging and Enhancement-A Review	DIAGNOSTICS																	Olawade, David/AAF-9929-2021; Boussios, Stergios/AAH-2933-2019	Olawade, David Bamidele/0000-0003-0188-9836; Boussios, Stergios/0000-0002-2512-6131														2075-4418				MAR 11	2025	15	6
J	Elgin, CY				Elgin, Cansu Yuksel			Democratizing Glaucoma Care: A Framework for AI-Driven Progression Prediction Across Diverse Healthcare Settings	JOURNAL OF OPHTHALMOLOGY																															2090-004X	2090-0058					2025	2025	1
J	Toprakli, AY				Toprakli, Abdurrahman Yagmur			AI-driven valuation: a new era for real estate appraisal	JOURNAL OF EUROPEAN REAL ESTATE RESEARCH																	TOPRAKLI, Abdurrahman/AAC-5800-2019	TOPRAKLI, Abdurrahman Yagmur/0000-0003-2437-9724													1753-9269					APR 15	2025	18	1
J	Aufieri, R; Mastrocola, F				Aufieri, Roberto; Mastrocola, Francesco			Balancing Technology, Ethics, and Society: A Review of Artificial Intelligence in Embryo Selection	INFORMATION																	Aufieri, Roberto/G-4463-2014	Aufieri, Roberto/0000-0002-9895-5926														2078-2489				JAN	2025	16	1
J	Calabro, RS; Mojdehdehbaher, S				Calabro, Rocco Salvatore; Mojdehdehbaher, Sepehr			AI-Driven Telerehabilitation: Benefits and Challenges of a Transformative Healthcare Approach	AI																	calabro, rocco/L-9570-2019	calabro, rocco salvatore/0000-0002-8566-3166														2673-2688				MAR 17	2025	6	3
J	Williamson, SM; Prybutok, V				Williamson, Steven M.; Prybutok, Victor			Balancing Privacy and Progress: A Review of Privacy Challenges, Systemic Oversight, and Patient Perceptions in AI-Driven Healthcare	APPLIED SCIENCES-BASEL																		Prybutok, Victor/0000-0003-3810-9039														2076-3417				JAN	2024	14	2
J	Yang, GX				Yang, Gexin			Computational Analysis and Literary Studies in the Era of AI: An Introduction	FORUM FOR WORLD LITERATURE STUDIES																															1949-8519	2154-6711				MAR	2025	17	1
J	Ozturk, O				Ozturk, Ozcan			The Impact of AI on International Trade: Opportunities and Challenges	ECONOMIES																	Ozturk, Ozcan/AGS-6653-2022															2227-7099				NOV	2024	12	11
J	Annan, R; Qingge, L				Annan, Richard; Qingge, Letu			Artificial intelligence in COVID-19 research: A comprehensive survey of innovations, challenges, and future directions	COMPUTER SCIENCE REVIEW																		Qingge, Letu/0000-0002-9745-9584													1574-0137	1876-7745				AUG	2025	57
J	Venugopal, M; Madhavan, V; Prasad, R; Raman, R				Venugopal, Murale; Madhavan, Vandana; Prasad, Rajiv; Raman, Raghu			Transformative AI in human resource management: enhancing workforce planning with topic modeling	COGENT BUSINESS & MANAGEMENT																	Raman, Raghu/AAL-9550-2020	Venugopalan, Dr.Murale/0000-0002-3851-845X													2331-1975					DEC 31	2024	11	1
J	Faa, G; Fraschini, M; Didaci, L; Saba, L; Scartozzi, M; Orvieto, E; Rugge, M				Faa, Gavino; Fraschini, Matteo; Didaci, Luca; Saba, Luca; Scartozzi, Mario; Orvieto, Enrico; Rugge, Massimo			Artificial histology in colonic Neoplasia: A critical approach	DIGESTIVE AND LIVER DISEASE																	Fraschini, Matteo/K-3399-2019	RUGGE, MASSIMO/0000-0002-0679-0563													1590-8658	1878-3562				MAR	2025	57	3
J	Meynhardt, C; Meybohm, P; Kranke, P; Hölzing, CR				Meynhardt, Charlotte; Meybohm, Patrick; Kranke, Peter; Hoelzing, Carlos Ramon			Advanced Prompt Engineering in Emergency Medicine and Anesthesia: Enhancing Simulation-Based e-Learning	ELECTRONICS																															2079-9292					MAR	2025	14	5
J	Lajczak, PM; Józwik, K				Lajczak, Pawel M.; Jozwik, Kamil			Artificial intelligence - an aid for physicians in chordoma management? A systematic review of current applications	ONCOLOGY IN CLINICAL PRACTICE																															2450-1654	2450-6478				2024 APR 15	2024
C	Arunachalam, G; Pavithra, MR; Varadarajan, MN; Vinya, VL; Geetha, T; Murugan, S			IEEE	Arunachalam, G.; Pavithra, M. R.; Varadarajan, Mageshkumar Naarayanasamy; Vinya, Viyyapu Lokeshwari; Geetha, T.; Murugan, S.			Human-Robot Interaction in Geriatric Care: RNN Model for Intelligent Companionship and Adaptive Assistance	2ND INTERNATIONAL CONFERENCE ON SUSTAINABLE COMPUTING AND SMART SYSTEMS, ICSCSS 2024					2nd International Conference on Sustainable Computing and Smart Systems (ICSCSS)	JUL 10-12, 2024	Hindusthan Coll Engn & Technol, Coimbatore, INDIA		Hindusthan Coll Engn & Technol								Lokeshwari vinya, Viyyapu/AEH-7551-2022; A, Gnana Soundari/AAG-7648-2019; Subbiah, Murugan/AED-9377-2022; Naarayanasamy Varadarajan, Mageshkumar/KIG-3635-2024	Viyyapu, Lokeshwari Vinya/0000-0001-9328-672X; Subbiah, Murugan/0000-0002-9823-4344; Naarayanasamy Varadarajan, Mageshkumar/0009-0004-7592-0757															979-8-3503-9155-8; 979-8-3503-7999-0				2024
J	Woodruff, E				Woodruff, Earl			AI Detection of Human Understanding in a Gen-AI Tutor	AI																		Woodruff, Earl/0000-0002-0958-8379														2673-2688				JUN	2024	5	2
J	Lee, W; Grasso, SV; Taher, H; Gumbs, A				Lee, Wayne; Grasso, S. Vincent; Taher, Heba; Gumbs, Andrew			Artificial Intelligence and Hepatic Surgery	EGYPTIAN JOURNAL OF SURGERY																															1110-1121	1687-7624				OCT-DEC	2024	43	4
J	Tacelli, M; Lauri, G; Tabacelia, D; Tieranu, CG; Arcidiacono, PG; Saftoiu, A				Tacelli, Matteo; Lauri, Gaetano; Tabacelia, Daniela; Tieranu, Cristian George; Arcidiacono, Paolo Giorgio; Saftoiu, Adrian			Integrating artificial intelligence with endoscopic ultrasound in the early detection of bilio-pancreatic lesions: Current advances and future prospects	BEST PRACTICE & RESEARCH CLINICAL GASTROENTEROLOGY																															1521-6918	1532-1916				FEB	2025	74
J	Chow, JCL; Li, K				Chow, James C. L.; Li, Kay			Developing Effective Frameworks for Large Language Model-Based Medical Chatbots: Insights From Radiotherapy Education With ChatePT	JMIR CANCER																															2369-1999						2025	11
J	Esmaeilzadeh, P				Esmaeilzadeh, Pouyan			Challenges and strategies for wide-scale artificial intelligence (AI) deployment in healthcare practices: A perspective for healthcare organizations	ARTIFICIAL INTELLIGENCE IN MEDICINE																		Esmaeilzadeh, Pouyan/0000-0002-3885-8112													0933-3657	1873-2860				MAY	2024	151
J	Almalawi, A; Soh, B; Li, A; Samra, H				Almalawi, Ahlam; Soh, Ben; Li, Alice; Samra, Halima			Predictive Models for Educational Purposes: A Systematic Review	BIG DATA AND COGNITIVE COMPUTING																	Samra, Halima/LZE-1509-2025	Samra, Halima/0000-0002-5199-3677; Soh, Ben/0000-0002-9519-886X														2504-2289				DEC	2024	8	12
J	Tadepalli, K; Das, A; Meena, T; Roy, S				Tadepalli, Kalyan; Das, Abhijit; Meena, Tanushree; Roy, Sudipta			Bridging gaps in artificial intelligence adoption for maternal-fetal and obstetric care: Unveiling transformative capabilities and challenges	COMPUTER METHODS AND PROGRAMS IN BIOMEDICINE																															0169-2607	1872-7565				MAY	2025	263
J	Abdullah, M; Malik, HA; Ali, A; Boopathy, R; Vo, PHN; Danaee, S; Ralph, P; Malik, S				Abdullah, Mohammed; Malik, Hafiza Aroosa; Ali, Abiha; Boopathy, Ramaraj; Vo, Phong H. N.; Danaee, Soroosh; Ralph, Peter; Malik, Sana			AI-Driven Algae Biorefineries: A New Era for Sustainable Bioeconomy	CURRENT POLLUTION REPORTS																	Ralph, Peter/C-5029-2009; Vo, Phong/Y-8977-2018														2198-6592					APR 11	2025	11	1
J	Alasadi, EA; Baiz, CR				Alasadi, Eman A. A.; Baiz, Carlos R. R.			Generative AI in Education and Research: Opportunities, Concerns, and Solutions	JOURNAL OF CHEMICAL EDUCATION																		Baiz, Carlos/0000-0003-0699-8468													0021-9584	1938-1328				JUL 27	2023	100	8
J	Elhaddad, M; Hamam, S				Elhaddad, Malek; Hamam, Sara			AI-Driven Clinical Decision Support Systems: An Ongoing Pursuit of Potential	CUREUS JOURNAL OF MEDICAL SCIENCE																																2168-8184				APR 6	2024	16	4
J	Olawade, DB; Marinze, S; Qureshi, N; Weerasinghe, K; Teke, J				Olawade, David B.; Marinze, Sheila; Qureshi, Nabeel; Weerasinghe, Kusal; Teke, Jennifer			The impact of artificial intelligence and machine learning in organ retrieval and transplantation: A comprehensive review	CURRENT RESEARCH IN TRANSLATIONAL MEDICINE																	Olawade, David/AAF-9929-2021	Olawade, David Bamidele/0000-0003-0188-9836													2452-3186					APR-JUN	2025	73	2
J	Gkintoni, E; Antonopoulou, H; Sortwell, A; Halkiopoulos, C				Gkintoni, Evgenia; Antonopoulou, Hera; Sortwell, Andrew; Halkiopoulos, Constantinos			Challenging Cognitive Load Theory: The Role of Educational Neuroscience and Artificial Intelligence in Redefining Learning Efficacy	BRAIN SCIENCES																	Gkintoni, Evgenia/AAW-3090-2021; Halkiopoulos, Constantinos/AAM-6206-2021; Halkiopoulos, Constantinos/O-7266-2017	Sortwell, Andrew/0000-0001-9987-5939; Halkiopoulos, Constantinos/0000-0001-7924-5075; Gkintoni, Evgenia/0000-0002-3197-2019; Antonopoulou, Hera/0000-0002-3936-435X														2076-3425				FEB	2025	15	2
J	Madanchian, M; Taherdoost, H				Madanchian, Mitra; Taherdoost, Hamed			AI-Powered Innovations in High-Tech Research and Development: From Theory to Practice	CMC-COMPUTERS MATERIALS & CONTINUA																	Taherdoost, Hamed/A-1270-2015; Madanchian, Mitra/AAO-4326-2020														1546-2218	1546-2226					2024	81	2
J	Mpitsi, M				Mpitsi, Maria			ARTIFICIAL INTELLIGENCE IN CYBERSECURITY: RIGOROUS CRITICAL REVIEW, METHODOLOGICAL CHALLENGES AND FUTURE RESEARCH DIRECTIONS	MATHEMATICS AND INFORMATICS																															1310-2230	1314-8532					2024	67	6
J	Kopalli, SR; Shukla, M; Jayaprakash, B; Kundlas, M; Srivastava, A; Jagtap, J; Gulati, M; Chigurupati, S; Ibrahim, E; Khandige, PS; Garcia, DS; Koppula, S; Gasmi, A				Kopalli, Spandana Rajendra; Shukla, Madhu; Jayaprakash, B.; Kundlas, Mayank; Srivastava, Ankur; Jagtap, Jayant; Gulati, Monica; Chigurupati, Sridevi; Ibrahim, Eiman; Khandige, Prasanna Shama; Garcia, Dario Salguero; Koppula, Sushruta; Gasmi, Amin			Artificial intelligence in stroke rehabilitation: From acute care to long-term recovery	NEUROSCIENCE																	J, Bharani chandar/JAC-8925-2023; Koppula, Sushruta/JRW-6571-2023; Jagtap, Jayant/ABF-6531-2021; Gasmi, Amin/AAL-3595-2020; CHIGURUPATI, SRIDEVI/GRX-8274-2022														0306-4522	1873-7544				APR 19	2025	572
J	Nehmeh, B; Rebehmed, J; Nehmeh, R; Taleb, R; Akoury, E				Nehmeh, Bilal; Rebehmed, Joseph; Nehmeh, Riham; Taleb, Robin; Akoury, Elias			Unlocking therapeutic frontiers: harnessing artificial intelligence in drug discovery for neurodegenerative diseases	DRUG DISCOVERY TODAY																	Akoury, Elias/AAG-2881-2019; Nehmeh, Bilal/HMV-1186-2023; Taleb, Robin/AAG-1835-2020	Rebehmed, Joseph/0000-0002-0909-6155; Akoury, Elias/0000-0001-5202-8935													1359-6446	1878-5832				DEC	2024	29	12
J	Bahr, R; Anibal, J; Bedrick, S; Bélisle-Pipon, JC; Bensoussan, Y; Blaylock, N; Castermans, J; Comito, K; Dorr, D; Hale, G; Jackson, C; Krussel, A; Kuman, K; Komarlu, AR; Lerner-Ellis, J; Powell, M; Ravitsky, V; Rameau, A; Reavis, C; Sigaras, A; Cruz, SS; Vojtech, J; Urbano, M; Watts, S; Zhao, R; Toghranegar, J				Bahr, Ruth; Anibal, James; Bedrick, Steven; Belisle-Pipon, Jean-Christophe; Bensoussan, Yael; Blaylock, Nate; Castermans, Joris; Comito, Keith; Dorr, David; Hale, Greg; Jackson, Christie; Krussel, Andrea; Kuman, Kimberly; Komarlu, Akash Raj; Lerner-Ellis, Jordan; Powell, Maria; Ravitsky, Vardit; Rameau, Anais; Reavis, Charlie; Sigaras, Alexandros; Cruz, Samantha Salvi; Vojtech, Jenny; Urbano, Meg…		Bridge2AI-Voice Consortium	Workshop summaries from the 2024 voice AI symposium, presented by the Bridge2AI-voice consortium	FRONTIERS IN DIGITAL HEALTH																	Bélisle-Pipon, Jean-Christophe/P-3132-2017; Powell, Maria/MBH-1265-2025; Sigaras, Alexandros/K-3037-2015; Bensoussan, Yael/AGZ-4557-2022; Lerner-Ellis, Jordan/KMU-7008-2024	Sigaras, Alexandros/0000-0002-7607-559X; Zhao, Robin/0009-0000-0345-2756														2673-253X				OCT 30	2024	6
J	Zaidi, SMH; Zuberi, HH; Iqbal, R; Ahmed, A; Alharbi, A; Sheikh, MU				Zaidi, Syed Muhammad Hassan; Zuberi, Habib Hussain; Iqbal, Rizwan; Ahmed, Adnan; Alharbi, Ayman; Sheikh, Muhammad Usman			Intelligent Process Automation Using Artificial Intelligence to Create Human Assistant	INTERNATIONAL JOURNAL OF SOFTWARE SCIENCE AND COMPUTATIONAL INTELLIGENCE-IJSSCI																	Zuberi, Habib Hussain/AFR-1943-2022														1942-9045	1942-9037				JAN-DEC	2025	17	1
J	Zhang, ZQ				Zhang, Ziqing			AI-Powered Intelligent Speech Processing: Evolution, Applications and Future Directions	INTERNATIONAL JOURNAL OF ADVANCED COMPUTER SCIENCE AND APPLICATIONS																															2158-107X	2156-5570				FEB	2025	16	2
J	Ferreira, DD; Ferreira, LG; Amorim, KA; Delfino, DCT; Ferreira, ACBH; Souza, LPCE				Ferreira, Danton Diego; Ferreira, Livia Garcia; Amorim, Katiucia Alves; Delfino, Deyvis Cabrini Teixeira; Ferreira, Ana Claudia Barbosa Honorio; Castro e Souza, Leandra Passarelli			Assessing the Links Between Artificial Intelligence and Precision Nutrition	CURRENT NUTRITION REPORTS																	Amorim, Katiúcia/HNQ-0263-2023; Ferreira, Danton/G-2685-2012	Ferreira, Danton/0000-0002-4504-7721; Alves Amorim, Katiucia/0000-0001-5205-8114; Cabrini Teixeira Delfino, Deyvis/0009-0003-6052-4746														2161-3311				MAR 15	2025	14	1
J	Allam, H				Allam, Hesham			Prescribing the Future: The Role of Artificial Intelligence in Pharmacy	INFORMATION																	Allam, Hesham/LZI-7731-2025															2078-2489				FEB	2025	16	2
J	Achuthan, K; Ramanathan, S; Srinivas, S; Raman, R				Achuthan, Krishnashree; Ramanathan, Sasangan; Srinivas, Sethuraman; Raman, Raghu			Advancing cybersecurity and privacy with artificial intelligence: current trends and future research directions	FRONTIERS IN BIG DATA																	Raman, Raghu/AAL-9550-2020; Achuthan, Krishnashree/AGS-6660-2022															2624-909X				DEC 5	2024	7
J	Hockly, N				Hockly, Nicky			Artificial Intelligence in English Language Teaching: The Good, the Bad and the Ugly	RELC JOURNAL																	Hockly, Nicky/KFK-5388-2024	Hockly, Nicky/0000-0002-7814-0690													0033-6882	1745-526X				AUG	2023	54	2
J	Upreti, G				Upreti, Garima			Advancements in Skull Base Surgery: Navigating Complex Challenges with Artificial Intelligence	INDIAN JOURNAL OF OTOLARYNGOLOGY AND HEAD & NECK SURGERY																		Upreti, Garima/0000-0003-1519-9553													2231-3796	0973-7707				2023 DEC 20	2023
J	Kahila, J; Vartiainen, H; Tedre, M; Arkko, E; Lin, A; Pope, N; Jormanainen, I; Valtonen, T				Kahila, Juho; Vartiainen, Henriikka; Tedre, Matti; Arkko, Eetu; Lin, Anssi; Pope, Nicolas; Jormanainen, Ilkka; Valtonen, Teemu			Pedagogical Framework for Cultivating Children's Data Agency and Creative Abilities in the Age of AI	INFORMATICS IN EDUCATION																	Kahila, Juho/MHQ-9707-2025														1648-5831	2335-8971					2024	23	2
J	Hariharasitaraman, S; Jayavel, A; Gnanasekaran, S; Sohail, SS; Madsen, DO				Hariharasitaraman, S.; Jayavel, Amudhavel; Gnanasekaran, Sambasivam; Sohail, Shahab Saquib; Madsen, Dag Oivind			Interpretable and ethical learning assessment transformer (IELAT): an explainable transformer model for personalized student assessments	COGENT EDUCATION																	Madsen, Dag Oivind/I-1587-2016	Madsen, Dag Oivind/0000-0001-8735-3332													2331-186X					DEC 31	2025	12	1
J	Sorbán, K				Sorban, Kinga			Ethical and legal implications of using AI-powered recommendation systems in streaming services	INFORMACIOS TARSADALOM																		Sorban, Kinga/0000-0002-9288-7897													1587-8694						2021	21	2
J	Ozaybi, MQB; Madkhali, ANM; Alhazmi, MAM; Faqihi, HMA; Alanazi, MM; Siraj, WHY; Zalah, AHA; Khormi, MMA; Salem, AMAA; Mashragi, TQM; Alotaibi, AN; Naji, AAM; Bagal, RMA; Marwee, HAA				Ozaybi, Mazen Qassem Bohais; Madkhali, Ahmed Nahari Mohammad; Alhazmi, Mohammed Ali Mohammed; Faqihi, Hesham Mohammad Ahmad; Alanazi, Mshari Marzoq; Siraj, Waheed Hadi Yahya; Zalah, Ahmed Hussain Ahmed; Khormi, Mohammed Mohsen Abdu; Salem, Ali Mohammed Ahmed Al; Mashragi, Talal Qasim Mosa; Alotaibi, Ahmed Nawaf; Naji, Ahmed Ali Mussa; Bagal, Rehab Moaied Abdo; Marwee, Hussain Ali Ahmed			The Role of Artificial Intelligence in Drug Discovery and Development	EGYPTIAN JOURNAL OF CHEMISTRY																															0449-2285	2357-0245				DEC	2024	67	13
J	Xu, XW				Xu, Xiwen			AI optimization algorithms enhance higher education management and personalized teaching through empirical analysis	SCIENTIFIC REPORTS																															2045-2322					MAR 24	2025	15	1
J	Jeyaraman, M; Balaji, S; Jeyaraman, N; Yadav, S				Jeyaraman, Madhan; Balaji, Sangeetha; Jeyaraman, Naveen; Yadav, Sankalp			Unraveling the Ethical Enigma: Artificial Intelligence in Healthcare	CUREUS JOURNAL OF MEDICAL SCIENCE																	Jeyaraman, Madhan/ABB-8464-2020; Yadav, Sankalp/C-8076-2016	Yadav, Sankalp/0000-0001-6367-7228														2168-8184				AUG 10	2023	15	8
C	Maaloul, K			IEEE	Maaloul, Kamel			Identifying AI-Written Text in Academia: A Machine Learning-Based Framework	2024 1ST INTERNATIONAL CONFERENCE ON ELECTRICAL, COMPUTER, TELECOMMUNICATION AND ENERGY TECHNOLOGIES, ECTE-TECH					1st International Conference on Electrical, Computer, Telecommunication and Energy Technologies	DEC 17-18, 2024	Oum el Bouaghi, ALGERIA																										979-8-3503-8849-7; 979-8-3503-8848-0				2024
J	Nimri, R; Yang, ELE				Nimri, Rawan; Yang, Elaine			Addressing the elephant in the room: engaging students in ChatGPT conversations on assessments	JOURNAL OF TEACHING IN TRAVEL & TOURISM																	Nimri, Rawan/AAV-6867-2020; Yang, Elaine/AAJ-5185-2020	Yang, Elaine Chiao Ling/0000-0001-5245-1688; Nimri, Rawan/0000-0001-7337-3658													1531-3220	1531-3239				OCT 1	2024	24	4
J	Chowdhury, AT; Salam, A; Naznine, M; Abdalla, D; Erdman, L; Chowdhury, MEH; Abbas, TO				Chowdhury, Adiba Tabassum; Salam, Abdus; Naznine, Mansura; Abdalla, Da'ad; Erdman, Lauren; Chowdhury, Muhammad E. H.; Abbas, Tariq O.			Artificial Intelligence Tools in Pediatric Urology: A Comprehensive Review of Recent Advances	DIAGNOSTICS																	Chowdhury, Muhammad/J-6916-2019; Abbas, Tariq O/P-7893-2015	Abbas, Tariq O/0000-0002-8425-4029; Salam, Abdus/0009-0007-0787-1342; Naznine, Mansura/0009-0007-0296-9981; Abdalla, Da'ad/0000-0002-6476-6123; Chowdhury, Adiba Tabassum/0009-0001-6363-9018; Chowdhury, Muhammad Enamul Hoque/0000-0003-0744-8206														2075-4418				SEP	2024	14	18
J	Mooghal, M; Nasir, S; Arif, A; Khan, W; Rashid, YA; Vohra, LM				Mooghal, Mehwish; Nasir, Saad; Arif, Aiman; Khan, Wajiha; Rashid, Yasmin Abdul; Vohra, Lubna M.			Innovations in Artificial Intelligence-Driven Breast Cancer Survival Prediction: A Narrative Review	CANCER INFORMATICS																	Nasir, Saad/KGM-6325-2024	Mooghal, Mehwish/0000-0002-6386-4047														1176-9351					2024	23
J	Park, J; Kang, D				Park, Jiyoung; Kang, Dongheon			Artificial Intelligence and Smart Technologies in Safety Management: A Comprehensive Analysis Across Multiple Industries	APPLIED SCIENCES-BASEL																	Kang, Dongheon/GVU-0107-2022; Park, Jiyoung/GZM-1889-2022	Kang, Dongheon/0000-0001-8952-1547; Park, Jiyoung/0000-0002-0399-7083														2076-3417				DEC	2024	14	24
C	Rayhan, T; Siddika, A; Hasan, M; Elme, NS		Yang, XS; Sherratt, S; Dey, N; Joshi, A		Rayhan, Tapu; Siddika, Ayesha; Hasan, Mehedi; Elme, Nafisa Sultana			Social Media Emotion Detection and Analysis System Using Cutting-Edge Artificial Intelligence Techniques	PROCEEDINGS OF NINTH INTERNATIONAL CONGRESS ON INFORMATION AND COMMUNICATION TECHNOLOGY, VOL 5, ICICT 2024	Lecture Notes in Networks and Systems				9th International Congress on Information and Communication Technology (ICICT)	FEB 19-22, 2024	London, ENGLAND	Global Knowledge Res Foundat									Rayhan, Tapu/JWA-1866-2024														2367-3370	2367-3389	978-981-97-3288-3; 978-981-97-3289-0				2024	1000
J	Anderson, C; Heinisch, JS; Deldari, S; Salim, F; Ohly, S; David, K; Pejovic, V				Anderson, Christoph; Heinisch, Judith Simone; Deldari, Shohreh; Salim, Flora; Ohly, Sandra; David, Klaus; Pejovic, Veljko			Toward Social Role-Based Interruptibility Management	IEEE PERVASIVE COMPUTING																	Heinisch, Judith Simone/MCK-2809-2025; Ohly, Sandra/AAB-8707-2019; Pejovic, Veljko/L-2530-2016	Deldari, Shohreh/0000-0001-8150-120X; Salim, Flora/0000-0002-1237-1664; Pejovic, Veljko/0000-0002-9009-0024; Ohly, Sandra/0000-0001-6818-7519; Anderson, Christoph/0000-0002-4082-8457; David, Klaus/0000-0002-6600-9329													1536-1268	1558-2590				JAN 1	2023	22	1
J	AlSamhori, AF; AlSamhori, JF; Dib, C; AlSamhori, ARF; Shehadeh, MW; Rihani, J; Saadeh, A; Al-sabbagh, MQ; Almajali, H				AlSamhori, Ahmad Feras; AlSamhori, Jehad Feras; Dib, Christie; AlSamhori, Abdel Rahman Feras; Shehadeh, Mohammed Wael; Rihani, Jude; Saadeh, Ahmad; Al-sabbagh, Maryam Qussay; Almajali, Hala			Implication of artificial intelligence on astrocytoma detection and treatment	AVICENNA																	AlSamhori, Jehad/LRT-4512-2024														2220-2749						2025	2025	1
J	Atmakuru, A; Shahini, A; Chakraborty, S; Seoni, S; Salvi, M; Hafeez-Baig, A; Rashid, S; San Tan, R; Barua, PD; Molinari, F; Acharya, UR				Atmakuru, Anirudh; Shahini, Alen; Chakraborty, Subrata; Seoni, Silvia; Salvi, Massimo; Hafeez-Baig, Abdul; Rashid, Sadaf; San Tan, Ru; Barua, Prabal Datta; Molinari, Filippo; Acharya, U. Rajendra			Artificial intelligence-based suicide prevention and prediction: A systematic review (2019-2023)-2023)	INFORMATION FUSION																	Salvi, Massimo/AAJ-1394-2020; Hafeez-Baig, Abdul/AFM-8105-2022; Acharya, Rajendra/E-3791-2010; Chakraborty, Subrata/IXX-0792-2023	Atmakuru, Anirudh/0000-0003-1448-7334; Hafeez-Baig, Abdul/0000-0003-3848-8008; Tan, Ru San/0000-0003-2086-6517; Chakraborty, Subrata/0000-0002-0102-5424													1566-2535	1872-6305				FEB	2025	114
J	Kamalov, F; Calonge, DS; Gurrib, I				Kamalov, Firuz; Calonge, David Santandreu; Gurrib, Ikhlaas			New Era of Artificial Intelligence in Education: Towards a Sustainable Multifaceted Revolution	SUSTAINABILITY																	Santandreu Calonge, David/AHE-1864-2022; Gurrib, Ikhlaas/D-4831-2018	Gurrib, Ikhlaas/0000-0001-8393-9790														2071-1050				AUG	2023	15	16
J	Srivastava, V; Kumar, R; Wani, MY; Robinson, K; Ahmad, A				Srivastava, Vartika; Kumar, Ravinder; Wani, Mohmmad Younus; Robinson, Keven; Ahmad, Aijaz			Role of artificial intelligence in early diagnosis and treatment of infectious diseases	INFECTIOUS DISEASES																	Kumar, Ravinder/AAE-1547-2019; Wani, Mohmmad/AAJ-5016-2020; Wani, Mohmmad Younus/E-3909-2018	, Ravinder Kumar/0000-0003-1922-0030; Srivastava, Vartika/0000-0002-8636-3413; Wani, Mohmmad Younus/0000-0002-1838-1337													2374-4235	2374-4243				JAN 2	2025	57	1
J	Castro, GPB; Chiappe, A; Rodríguez, DFB; Sepulveda, FG				Castro, Gina Paola Barrera; Chiappe, Andres; Rodriguez, Diego Fernando Becerra; Sepulveda, Felipe Gonzalo			Harnessing AI for Education 4.0: Drivers of Personalized Learning	ELECTRONIC JOURNAL OF E-LEARNING																	Rodriguez Ibañez, Diego Fernando/JRW-3305-2023; Chiappe, Andres/D-7809-2015	Barrera Castro, Gina Paola/0009-0008-3788-6462; Chiappe, Andres/0000-0002-9664-4833													1479-4403					NOV	2024	22	5
J	Marengo, A				Marengo, Agostino			Navigating the nexus of AI and IoT: A comprehensive review of data analytics and privacy paradigms	INTERNET OF THINGS																	Marengo, Agostino/HMP-2450-2023	Marengo, Agostino/0000-0003-2769-5642													2543-1536	2542-6605				OCT	2024	27
J	Perlekar, P; Desai, A				Perlekar, Pooja; Desai, Amruta			The Role of Artificial Intelligence in Personalized Medicine: Challenges and Opportunities	METALLURGICAL & MATERIALS ENGINEERING																															2217-8961	2812-9105					2025	31	3
J	Mokhtar, WKAW; Ibrahim, A; Anas, N; Ahyar; Sayekti, I				Mokhtar, Wan Khairul Aiman Wan; Ibrahim, Abdullah; Anas, Norazmi; Ahyar; Sayekti, Imam			Ethical risks of using ChatGPT in higher education institutions in Malaysia	MASYARAKAT KEBUDAYAAN DAN POLITIK																	bin anas, Norazmi/Q-9912-2019														2086-7050	2528-6013				DEC	2024	37	4
J	Akter, S; Dwivedi, YK; Biswas, K; Michael, K; Bandara, RJ; Sajib, S				Akter, Shahriar; Dwivedi, Yogesh K.; Biswas, Kumar; Michael, Katina; Bandara, Ruwan J.; Sajib, Shahriar			Addressing Algorithmic Bias in AI-Driven Customer Management	JOURNAL OF GLOBAL INFORMATION MANAGEMENT																	Dwivedi, Yogesh/A-5362-2008; Michael, Katina/KAM-0050-2024; Bandara, Ruwan/C-5877-2019; Akter, Shahriar/S-2888-2019	Bandara, Ruwan J./0000-0003-1983-6097; Dwivedi, Yogesh/0000-0002-5547-9990; Sajib, Shahriar/0000-0003-0209-7718; Akter, Shahriar/0000-0002-2050-9985													1062-7375	1533-7995				NOV-DEC	2021	29	6
C	Patil, G; Patil, T; Wagh, K			IEEE	Patil, Gautam; Patil, Tanaya; Wagh, Kishor			Bridging Neuroscience and Minds: Exploring Collective Intelligence through Brain Duplication using AI	2023 31ST IRISH CONFERENCE ON ARTIFICIAL INTELLIGENCE AND COGNITIVE SCIENCE, AICS					31st Irish Conference on Artificial Intelligence and Cognitive Science (AICS)	DEC 07-08, 2023	Letterkenny, IRELAND										Wagh, Kishor/JCE-4760-2023	Wagh, Kishor/0000-0002-0309-0705															979-8-3503-6021-9				2023
J	Aleem, MU; Khan, JA; Younes, A; Sabbah, BN; Saleh, W; Migliore, M				Aleem, Mohamed Umair; Khan, Jibran Ahmad; Younes, Asser; Sabbah, Belal Nedal; Saleh, Waleed; Migliore, Marcello			Enhancing Thoracic Surgery with AI: A Review of Current Practices and Emerging Trends	CURRENT ONCOLOGY																	migliore, marcello/O-7545-2017	migliore, marcello/0000-0002-6272-8983; , Mohamed Umair, Umair Aleem/0009-0004-4612-425X; Sabbah, Belal/0000-0001-9131-7430													1198-0052	1718-7729				OCT	2024	31	10
J	Singh, H; Nim, DK; Randhawa, AS; Ahluwalia, S				Singh, Harmanjit; Nim, Dwividendra Kumar; Randhawa, Aaronbir Singh; Ahluwalia, Saher			Integrating clinical pharmacology and artificial intelligence: potential benefits, challenges, and role of clinical pharmacologists	EXPERT REVIEW OF CLINICAL PHARMACOLOGY																	Singh, Harmanjit/AAT-4880-2020	NIM, DWIVIDENDRA KUMAR/0009-0003-7823-7665													1751-2433	1751-2441				APR 2	2024	17	4
J	Amann, J; Blasimme, A; Vayena, E; Frey, D; Madai, VI				Amann, Julia; Blasimme, Alessandro; Vayena, Effy; Frey, Dietmar; Madai, Vince I.		Precise4Q Consortium	Explainability for artificial intelligence in healthcare: a multidisciplinary perspective	BMC MEDICAL INFORMATICS AND DECISION MAKING																	Amann, Julia/AAA-4127-2019; Vayena, Effy/ABD-8272-2021; Madai, Vince/AAF-5525-2020; Madai, Vince/GYD-7365-2022	Amann, Julia/0000-0003-2155-5286; Blasimme, Alessandro/0000-0001-5908-2002; Madai, Vince/0000-0002-8552-6954; Frey, Dietmar/0000-0001-5407-2331														1472-6947				NOV 30	2020	20	1
J	Khairullah, SA; Harris, S; Hadi, HJ; Sandhu, RA; Ahmad, N; Alshara, MA				Khairullah, Suleman Ahmad; Harris, Sheetal; Hadi, Hassan Jalil; Sandhu, Rida Anjum; Ahmad, Naveed; Alshara, Mohammed Ali			Implementing artificial intelligence in academic and administrative processes through responsible strategic leadership in the higher education institutions	FRONTIERS IN EDUCATION																	Harris, Sheetal/MTG-0145-2025															2504-284X				FEB 27	2025	10
J	Nadim, MA; Di Fuccio, R				Nadim, Muhammad Amin; Di Fuccio, Raffaele			Unveiling the Potential: Artificial Intelligence's Negative Impact on Teaching and Research Considering Ethics in Higher Education	EUROPEAN JOURNAL OF EDUCATION																	Di Fuccio, Raffaele/HLG-7630-2023; NADIM, MUHAMMAD AMIN/ISA-4511-2023; Di Fuccio, Raffaele/C-4970-2015	NADIM, MUHAMMAD AMIN/0000-0001-5106-0220; Di Fuccio, Raffaele/0000-0001-8886-3967													0141-8211	1465-3435				MAR	2025	60	1
J	Javed, H; Muqeet, HA; Danesh, A; Rehman, AU; Javed, T; Bermak, A				Javed, Haseeb; Muqeet, Hafiz Abdul; Danesh, Amirhossein; Rehman, Atiq Ur; Javed, Tahir; Bermak, Amine			Impact of AI and Dynamic Ensemble Techniques in Enhancing Healthcare Services: Opportunities and Ethical Challenges	IEEE ACCESS																	rehman, atiq/AAP-7152-2020; Muqeet, Abdul/GWU-7153-2022; Bermak, Amine/G-9915-2013; javed, haseeb/IQR-5720-2023	ur Rehman, Atiq/0000-0003-0248-7919; javed, haseeb/0000-0002-7509-182X													2169-3536						2024	12
J	Mourya, A; Jobanputra, B; Pai, R				Mourya, Aman; Jobanputra, Bhavika; Pai, Rohan			AI-powered clinical trials and the imperative for regulatory transparency and accountability	HEALTH AND TECHNOLOGY																	Pai, Rohan/AFS-1420-2022	Pai, Rohan/0000-0003-3064-6729													2190-7188	2190-7196				NOV	2024	14	6
J	Sequí-Sabater, JM; Benavent, D				Sequi-Sabater, Jose Miguel; Benavent, Diego			Artificial intelligence in rheumatology research: what is it good for?	RMD OPEN																		Jose Miguel, Sequi-Sabater/0000-0001-8437-1623													2056-5933					JAN 7	2025	11	1
J	Goel, I; Bhaskar, Y; Kumar, N; Singh, S; Amanullah, M; Dhar, R; Karmakar, S				Goel, Isha; Bhaskar, Yogendra; Kumar, Nand; Singh, Sunil; Amanullah, Mohammed; Dhar, Ruby; Karmakar, Subhradip			Role of AI in empowering and redefining the oncology care landscape: perspective from a developing nation	FRONTIERS IN DIGITAL HEALTH																	Dhar, Ruby/KHX-1076-2024; GOEL, ISHA/KHU-6432-2024; Mohammed, Amanullah/B-9778-2018															2673-253X				MAR 4	2025	7
J	Grana-Castro, O; Izquierdo, E; Pinas-Mesa, A; Menasalvas, E; Chivato-Pérez, T				Grana-Castro, Osvaldo; Izquierdo, Elena; Pinas-Mesa, Antonio; Menasalvas, Ernestina; Chivato-Perez, Tomas			Assessing the Impact of New Technologies on Managing Chronic Respiratory Diseases	JOURNAL OF CLINICAL MEDICINE																	Izquierdo, Elena/Z-1861-2019; Grana Castro, Osvaldo/F-8603-2016; menasalvas, ernestina/A-6124-2011; PINAS-MESA, ANTONIO/K-4047-2017	Grana Castro, Osvaldo/0000-0003-1615-4242; menasalvas, ernestina/0000-0002-5615-6798; PINAS-MESA, ANTONIO/0000-0002-3641-2651; Izquierdo, Elena/0000-0002-3355-2798														2077-0383				NOV	2024	13	22
J	Vukovic, DB; Dekpo-Adza, S; Matovic, S				Vukovic, Darko B.; Dekpo-Adza, Senanu; Matovic, Stefana			AI integration in financial services: a systematic review of trends and regulatory challenges	HUMANITIES & SOCIAL SCIENCES COMMUNICATIONS																																2662-9992				APR 22	2025	12	1
J	Ren, XY; Wu, ML				Ren, Xinyue; Wu, Min Lun			Examining Teaching Competencies and Challenges While Integrating Artificial Intelligence in Higher Education	TECHTRENDS																	Ren, Xinyue/AAZ-4197-2021; Yuksel, Asiye/F-5938-2018	Ren, Xinyue/0000-0002-1042-0100; Yuksel, Asiye/0000-0003-0749-3576													8756-3894	1559-7075				2025 FEB 17	2025
J	Mairi, A; Hamza, L; Touati, A				Mairi, Assia; Hamza, Lamia; Touati, Abdelaziz			Artificial intelligence and its application in clinical microbiology	EXPERT REVIEW OF ANTI-INFECTIVE THERAPY																	TOUATI, Abdelaziz/N-5759-2016; MAIRI, Assia/ABI-2926-2020; hamza, lamia/ACB-4905-2022														1478-7210	1744-8336				2025 MAR 29	2025
C	Bin Tareaf, R; Korga, AM; Wefers, S; Hanken, K			Assoc Computing Machinery	Bin Tareaf, Raad; Korga, Alex Maximilian; Wefers, Sebastian; Hanken, Keno			Mining Minds: Predicting IQ Scores Using Social Media Textual Analytics	2024 16TH INTERNATIONAL CONFERENCE ON MACHINE LEARNING AND COMPUTING, ICMLC 2024					16th International Conference on Machine Learning and Computing (ICMLC)	FEB 02-05, 2024	Shenzhen, PEOPLES R CHINA	Shenzhen Univ, Natl Engn Lab Big Data Syst Comp Technol									Bin Tareaf, Raad/AAF-7790-2020																979-8-4007-0923-4				2024
J	Yan, L; Li, Q; Fu, K; Zhou, XD; Zhang, K				Yan, Li; Li, Qing; Fu, Kang; Zhou, Xiaodong; Zhang, Kai			Progress in the Application of Artificial Intelligence in Ultrasound-Assisted Medical Diagnosis	BIOENGINEERING-BASEL																	Zhou, Xiaodong/AAV-8650-2021	Yan, Li/0000-0001-9079-8826														2306-5354				MAR 13	2025	12	3
J	Alavi, M; Leidner, DE; Mousavi, R				Alavi, Maryam; Leidner, Dorothy E.; Mousavi, Reza			A Knowledge Management Perspective of Generative Artificial Intelligence	JOURNAL OF THE ASSOCIATION FOR INFORMATION SYSTEMS																															1536-9323	1558-3457					2024	25	1
J	Kale, M; Wankhede, N; Pawar, R; Ballal, S; Kumawat, R; Goswami, M; Khalid, M; Taksande, B; Upaganlawar, A; Umekar, M; Kopalli, NR; Koppula, S				Kale, Mayur; Wankhede, Nitu; Pawar, Rupali; Ballal, Suhas; Kumawat, Rohit; Goswami, Manish; Khalid, Mohammad; Taksande, Brijesh; Upaganlawar, Aman; Umekar, Milind; Kopalli, ndana Rajendra; Koppula, Sushruta			AI-driven innovations in Alzheimer's disease: Integrating early diagnosis, personalized treatment, and prognostic modelling	AGEING RESEARCH REVIEWS																	Khalid, Mohammad/LEM-5936-2024; Wankhede, Nitu/HJP-0404-2023; Kale, Mayur/GQI-0968-2022; Ballal, Suhas/ABA-2862-2021; Koppula, Sushruta/JRW-6571-2023; Koppula, Sushruta/F-2817-2013	Koppula, Sushruta/0000-0002-8597-7763; Ballal, Suhas/0000-0002-6041-8332; Khalid, Mohammad/0000-0002-2163-0066													1568-1637	1872-9649				NOV	2024	101
J	Reddy, DT; Grewal, I; Pinzon, LFG; Latchireddy, B; Goraya, S; Alansari, BA; Gadwal, A				Reddy, Dhammadam Thribhuvan; Grewal, Inayat; Pinzon, Luisa Fernanda Garcia; Latchireddy, Bhargavi; Goraya, Simran; Alansari, Badriya Ali; Gadwal, Aishwarya			The Role of Artificial Intelligence in Healthcare: Enhancing Coronary Computed Tomography Angiography for Coronary Artery Disease Management	CUREUS JOURNAL OF MEDICAL SCIENCE																																2168-8184				JUN 2	2024	16	6
J	Evangelista, ED				Evangelista, Edmund De Leon			Ensuring academic integrity in the age of ChatGPT : Rethinking exam design, assessment strategies, and ethical AI policies in higher education	CONTEMPORARY EDUCATIONAL TECHNOLOGY																		Evangelista, Edmund/0000-0002-8050-1360														1309-517X				JAN	2025	17	1
J	Goudarzi, N; Taheri, Z; Salari, AMN; Kazemzadeh, K; Tafakhori, A				Goudarzi, Nooshin; Taheri, Zahra; Salari, Amir Mohammad Nezhad; Kazemzadeh, Kimia; Tafakhori, Abbas			Recognition and classification of facial expression using artificial intelligence as a key of early detection in neurological disorders	REVIEWS IN THE NEUROSCIENCES																	Taheri, zahra/HOC-5810-2023; Kazemzadeh, Kimia/JRW-8197-2023														0334-1763	2191-0200				2025 JAN 21	2025
J	Guettala, M; Bourekkache, S; Kazar, O; Harous, S				Guettala, Manel; Bourekkache, Samir; Kazar, Okba; Harous, Saad			Generative Artificial Intelligence in Education: Advancing Adaptive and Personalized Learning	ACTA INFORMATICA PRAGENSIA																	Harous, Saad/AAU-6859-2020; Kazar, Okba/W-2313-2019	Harous, Saad/0000-0001-6524-7352; KAZAR, Okba/0000-0003-0522-4954; Manel, GUETTALA/0000-0002-5814-4803														1805-4951					2024	13	3
J	Fritzsche, MC; Akyüz, K; Abadía, MC; McLennan, S; Marttinen, P; Mayrhofer, MT; Buyx, AM				Fritzsche, Marie-Christine; Akyuz, Kaya; Cano Abadia, Monica; McLennan, Stuart; Marttinen, Pekka; Mayrhofer, Michaela Th.; Buyx, Alena M.			Ethical layering in AI-driven polygenic risk scores-New complexities, new challenges	FRONTIERS IN GENETICS																	Akyuz, Kaya/R-4867-2016; McLennan, Stuart/C-1048-2015; Marttinen, Pekka/N-6234-2015	Akyuz, Kaya/0000-0002-2444-2095; McLennan, Stuart/0000-0002-2019-6253; Mayrhofer, Michaela Th./0000-0001-6932-0473; Cano Abadia, Monica/0000-0002-7726-9222; Marttinen, Pekka/0000-0001-7078-7927														1664-8021				JAN 26	2023	14
J	Vanhonacker, D; Verdonck, M; Carvalho, HN				Vanhonacker, Domien; Verdonck, Michael; Carvalho, Hugo Nogueira			Impact of Closed-Loop Technology, Machine Learning, and Artificial Intelligence on Patient Safety and the Future of Anesthesia	CURRENT ANESTHESIOLOGY REPORTS																	Carvalho, Hugo/AAT-2741-2020	Vanhonacker, Domien/0000-0003-0197-7852; Carvalho, Hugo/0000-0002-5784-5480														2167-6275				DEC	2022	12	4
J	Vistorte, AOR; Deroncele-Acosta, A; Ayala, JLM; Barrasa, A; López-Granero, C; Martí-González, M				Vistorte, Angel Olider Rojas; Deroncele-Acosta, Angel; Ayala, Juan Luis Martin; Barrasa, Angel; Lopez-Granero, Caridad; Marti-Gonzalez, Mariacarla			Integrating artificial intelligence to assess emotions in learning environments: a systematic literature review	FRONTIERS IN PSYCHOLOGY																	Deroncele-Acosta, Angel/IRZ-1383-2023; Barrasa, Angel/B-1206-2008; Martín Ayala, Juan Luis/ABG-6047-2021; Lopez Granero, Caridad/C-8316-2013; R. Vistorte, Angel O./U-7690-2017	Lopez Granero, Caridad/0000-0001-6767-8252; R. Vistorte, Angel O./0000-0003-2479-7491													1664-1078					JUN 19	2024	15
J	Tan, MQ; Xiao, YN; Jing, FS; Xie, YW; Lu, SM; Xiang, MQ; Ren, H				Tan, Miaoqing; Xiao, Yanning; Jing, Fengshi; Xie, Yewei; Lu, Sanmei; Xiang, Mingqiang; Ren, Hao			Evaluating machine learning-enabled and multimodal data-driven exercise prescriptions for mental health: a randomized controlled trial protocol	FRONTIERS IN PSYCHIATRY																	Jing, Fengshi/KHD-2106-2024	JING, Fengshi/0000-0002-6747-6527													1664-0640					JAN 15	2024	15
J	Prakash, GA; Nair, V				Prakash, G. Aswathy; Nair, Vishnu			Integrating Generative AI into Legal Education: From Casebooks to Code, Opportunities and Challenges	LAW TECHNOLOGY AND HUMANS																	; Prakash G, Dr. Aswathy/AAB-3912-2021	Nair, Dr Vishnu/0009-0008-4540-4128; Prakash G, Dr. Aswathy/0000-0003-0806-4562														2652-4074					2024	6	3
J	Kusunose, K				Kusunose, Kenya			Transforming Echocardiography: The Role of Artificial Intelligence in Enhancing Diagnostic Accuracy and Accessibility	INTERNAL MEDICINE																															0918-2918	1349-7235					2025	64	3
J	Rezaee, K				Rezaee, Khosro			Machine learning and facial recognition for down syndrome detection: A comprehensive review	COMPUTERS IN HUMAN BEHAVIOR REPORTS																	Rezaee, Khosro/AAA-9586-2021	Rezaee, Khosro/0000-0001-6763-6626													2451-9588					MAR	2025	17
C	Gjoreski, M; Hassan, T; Vered, M; Houben, S; Kopp, S			ACM	Gjoreski, Martin; Hassan, Teena; Vered, Mor; Houben, Sebastian; Kopp, Stefan			XAI for U: Explainable AI for Ubiquitous, Pervasive and Wearable Computing	COMPANION OF THE 2024 ACM INTERNATIONAL JOINT CONFERENCE ON PERVASIVE AND UBIQUITOUS COMPUTING, UBICOMP COMPANION 2024					ACM International Joint Conference on Pervasive and Ubiquitous Computing / ACM International Symposium on Wearable Computers (UbiComp/ISWC)	OCT 05-09, 2024	Melbourne, AUSTRALIA	ACM SIGCHI,ACM SIGMOBILE									Gjoreski, Martin/AAW-6793-2021; Kopp, Stefan/K-3456-2013; Houben, Sebastian/R-1865-2019	Houben, Sebastian/0000-0002-2036-419X; Hassan, Teena/0000-0002-6105-0752; Vered, Mor/0000-0001-5286-6509; Gjoreski, Martin/0000-0002-1220-7418															979-8-4007-1058-2				2024
J	Renz, A; Vladova, G				Renz, Andre; Vladova, Gergana			Reinvigorating the Discourse on Human-Centered Artificial Intelligence in Educational Technologies	TECHNOLOGY INNOVATION MANAGEMENT REVIEW																	Renz, André/HPG-0234-2023; Vladova, Gergana/LCU-9548-2024	Vladova, Gergana/0000-0002-4086-1724													1927-0321					MAY	2021	11	5
J	Munir, K				Munir, Kashif			Integrating AI into neurosurgical decisions: a new Frontier in medicine	EGYPTIAN JOURNAL OF NEUROSURGERY																																2520-8225				APR 5	2025	40	1
J	Non, LR; Marra, AR; Ince, D				Non, Lemuel R.; Marra, Alexandre R.; Ince, Dilek			Rise of the Machines - Artificial Intelligence in Healthcare Epidemiology	CURRENT INFECTIOUS DISEASE REPORTS																	Non, Lemuel/ABI-6570-2020; Ince, Dilek/AAW-4724-2021	Non, Lemuel/0000-0001-8438-4168													1523-3847	1534-3146				DEC	2025	27	1
J	Agostini, D; Lazareva, A; Picasso, F				Agostini, Daniele; Lazareva, Alexandra; Picasso, Federica			Advancements in technology-enhanced assessment in tertiary education	AUSTRALASIAN JOURNAL OF EDUCATIONAL TECHNOLOGY																	Agostini, Daniele/AAC-4978-2019	AGOSTINI, DANIELE/0000-0002-9919-5391; Picasso, Federica/0000-0002-8381-6456; Lazareva, Alexandra/0000-0002-3477-2944													1449-3098	1449-5554					2024	40	4
J	Tani, HA; Kumar, G				Tani, Hamed alqah; Kumar, Gulshan			Cybersecurity in Electric and Flying Vehicles: Threats, Challenges, AI Solutions & Future Directions	ACM COMPUTING SURVEYS																	Kumar, Gulshan/H-5810-2015; Alqahtani, Hamed/ACZ-1315-2022														0360-0300	1557-7341				APR	2025	57	4
J	Kopalle, PK; Gangwar, M; Uppal, A				Kopalle, Praveen K.; Gangwar, Manish; Uppal, Abhinav			Commentary on AI is Changing the World: For Better or for Worse?	JOURNAL OF MACROMARKETING																	Uppal, Abhinav/LJK-1071-2024; Gangwar, Manish/G-1218-2015	Gangwar, Manish/0000-0003-0661-5922; Kopalle, Praveen/0000-0002-2430-2228													0276-1467	1552-6534				DEC	2024	44	4
J	Rudroff, T; Klen, R; Rainio, O; Tuulari, J				Rudroff, Thorsten; Klen, Riku; Rainio, Oona; Tuulari, Jetro			The Untapped Potential of Dimension Reduction in Neuroimaging: Artificial Intelligence-Driven Multimodal Analysis of Long COVID Fatigue	BRAIN SCIENCES																	Tuulari, Jetro/ABB-8747-2020; Klen, Riku/G-4339-2016	Rainio, Oona/0000-0002-7775-7656; Klen, Riku/0000-0002-0982-8360; Rudroff, T/0000-0002-2057-7793														2076-3425				DEC	2024	14	12
J	Chevalier, O; Dubey, G; Benkabbou, A; Majbar, MA; Souadka, A				Chevalier, Olivia; Dubey, Gerard; Benkabbou, Amine; Majbar, Mohammed Anass; Souadka, Amine			Comprehensive overview of artificial intelligence in surgery: a systematic review and perspectives	PFLUGERS ARCHIV-EUROPEAN JOURNAL OF PHYSIOLOGY																	Majbar, Anass/AAB-7168-2020														0031-6768	1432-2013				APR	2025	477	4
J	Jones, A; Tang, RY; Dabo-Trubelja, A; Yeoh, CB; Richards, L; Gottumukkala, V				Jones, Anastasia; Tang, Ryan; Dabo-Trubelja, Anahita; Yeoh, Cindy B.; Richards, Leshawn; Gottumukkala, Vijaya			Optimising artificial intelligence ultrasound tools in anaesthesiology and perioperative medicine: The next frontier for advanced technology application	INDIAN JOURNAL OF ANAESTHESIA																	Dabo-Trubelja, Anahita/GSI-6584-2022														0019-5049	0976-2817				NOV	2024	68	11
J	Sajdeya, R; Narouze, S				Sajdeya, Ruba; Narouze, Samer			Harnessing artificial intelligence for predicting and managing postoperative pain: a narrative literature review	CURRENT OPINION IN ANESTHESIOLOGY																	Sajdeya, Ruba/AAR-1921-2021														0952-7907	1473-6500				OCT	2024	37	5
J	Marsico, F; Amigo, M				Marsico, Franco; Amigo, Martin			Ethical and security challenges in AI for forensic genetics: From bias to adversarial attacks	FORENSIC SCIENCE INTERNATIONAL-GENETICS																	Marsico, Franco/JXX-5500-2024	Marsico, Franco Leonel/0000-0002-0740-5516													1872-4973	1878-0326				MAR	2025	76
J	Strand, F				Strand, Fredrik			AI image analysis as the basis for risk-stratified screening	JAPANESE JOURNAL OF RADIOLOGY																	Strand, Fredrik/AFH-8721-2022	Strand, Fredrik/0000-0003-3910-7086													1867-1071	1867-108X				2025 JAN 11	2025
J	Grunhut, J; Marques, O; Wyatt, ATM				Grunhut, Joel; Marques, Oge; Wyatt, Adam T. M.			Needs, Challenges, and Applications of Artificial Intelligence in Medical Education Curriculum	JMIR MEDICAL EDUCATION																	Grunhut, Joel/JZH-3859-2024	Wyatt, Adam TM/0000-0003-3160-6147; Grunhut, Joel/0000-0002-8104-9679													2369-3762					APR-JUN	2022	8	2
J	Le, MHN; Nguyen, PK; Nguyen, TPT; Nguyen, HQ; Tam, DNH; Huynh, HH; Huynh, PK; Le, NQK				Le, Minh Huu Nhat; Nguyen, Phat Ky; Nguyen, Thi Phuong Trang; Nguyen, Hien Quang; Tam, Dao Ngoc Hien; Huynh, Han Hong; Huynh, Phat Kim; Le, Nguyen Quoc Khanh			An in-depth review of AI-powered advancements in cancer drug discovery	BIOCHIMICA ET BIOPHYSICA ACTA-MOLECULAR BASIS OF DISEASE																	Tam, Dao/AAN-8592-2020; Nguyen, Hien/JRY-3415-2023	Nguyen, Hien/0000-0002-1757-5359; Tam, Dao Ngoc Hien/0000-0003-0162-2373													0925-4439	1879-260X				MAR	2025	1871	3
J	Sanjalawe, Y; Fraihat, S; Al-E'Mari, S; Abualhaj, M; Makhadmeh, S; Alzubi, E				Sanjalawe, Yousef; Fraihat, Salam; Al-E'Mari, Salam; Abualhaj, Mosleh; Makhadmeh, Sharif; Alzubi, Emran			A Review of 6G and AI Convergence: Enhancing Communication Networks With Artificial Intelligence	IEEE OPEN JOURNAL OF THE COMMUNICATIONS SOCIETY																	Al-E'mari, Salam/AAA-9641-2020; Sanjalawe, Yousef/IUQ-1966-2023; Abualhaj, Mosleh/IQS-2781-2023; Makhadmeh, Sharif/A-3428-2019	Sanjalawe, Yousef/0000-0002-4442-1865; Al-E'mari, Salam/0000-0002-2134-4158; Makhadmeh, Sharif/0000-0002-2894-7998														2644-125X					2025	6
J	Daher, H; Punchayil, SA; Ismail, AAE; Fernandes, RR; Jacob, J; Algazzar, MH; Mansour, M				Daher, Hisham; Punchayil, Sneha A.; Ismail, Amro Ahmed Elbeltagi; Fernandes, Reuben Ryan; Jacob, Joel; Algazzar, Mohab H.; Mansour, Mohammad			Advancements in Pancreatic Cancer Detection: Integrating Biomarkers, Imaging Technologies, and Machine Learning for Early Diagnosis	CUREUS JOURNAL OF MEDICAL SCIENCE																																2168-8184				MAR 20	2024	16	3
J	Karabacak, M; Ozkara, BB; Margetis, K; Wintermark, M; Bisdas, S				Karabacak, Mert; Ozkara, Burak Berksu; Margetis, Konstantinos; Wintermark, Max; Bisdas, Sotirios			The Advent of Generative Language Models in Medical Education	JMIR MEDICAL EDUCATION																	Ozkara, Burak Berksu/JDW-3748-2023; Margetis, Konstantinos/M-1104-2019; Karabacak, Mert/HMW-1735-2023; Bisdas, Sotirios/P-2549-2016	Karabacak, Mert/0000-0002-9263-9893; Margetis, Konstantinos/0000-0002-3715-8093; Bisdas, Sotirios/0000-0001-9930-5549; Ozkara, Burak Berksu/0000-0002-8769-3342													2369-3762						2023	9
J	Vladimirovna, PA				Vladimirovna, Pokrovskaya Anna			The application of AI technologies: Enforcement of trademark rights on e-commerce marketplaces	JOURNAL OF WORLD INTELLECTUAL PROPERTY																		Pokrovskaya, Anna/0009-0002-6473-2027													1422-2213	1747-1796				2025 FEB 24	2025
J	Chettri, SK; Deka, RK; Saikia, MJ				Chettri, Sarat Kumar; Deka, Rup Kumar; Saikia, Manob Jyoti			Bridging the Gap in the Adoption of Trustworthy AI in Indian Healthcare: Challenges and Opportunities	AI																	Chettri, Sarat/AAK-6197-2020; Deka, Rup/AAH-9853-2019; Saikia, Manob Jyoti/Q-6279-2018	Saikia, Manob Jyoti/0000-0001-6656-4333; Chettri, Dr. Sarat Kumar/0000-0002-6031-6440														2673-2688				JAN	2025	6	1
J	Son, A; Park, J; Kim, W; Yoon, Y; Lee, S; Park, Y; Kim, H				Son, Ahrum; Park, Jongham; Kim, Woojin; Yoon, Yoonki; Lee, Sangwoon; Park, Yongho; Kim, Hyunsoo			Revolutionizing Molecular Design for Innovative Therapeutic Applications through Artificial Intelligence	MOLECULES																	Kim, Hyunsoo/JEF-9561-2023	Sohn, Areum/0000-0003-2706-1340; Kim, Hyunsoo/0000-0002-8441-3376														1420-3049				OCT	2024	29	19
J	Rejeb, A; Rejeb, K; Appolloni, A; Treiblmaier, H; Iranmanesh, M				Rejeb, Abderahman; Rejeb, Karim; Appolloni, Andrea; Treiblmaier, Horst; Iranmanesh, Mohammad			Exploring the impact of ChatGPT on education: A web mining and machine learning approach	INTERNATIONAL JOURNAL OF MANAGEMENT EDUCATION																	Treiblmaier, Horst/X-1282-2019; Appolloni, Andrea/L-3607-2014	Appolloni, Andrea/0000-0001-5741-398X; Treiblmaier, Horst/0000-0002-0755-5223													1472-8117	2352-3565				MAR	2024	22	1
J	Higgins, O; Wilson, RL				Higgins, Oliver; Wilson, Rhonda L.			Integrating Artificial Intelligence (AI) With Workforce Solutions for Sustainable Care: A Follow Up to Artificial Intelligence and Machine Learning (ML) Based Decision Support Systems in Mental Health	INTERNATIONAL JOURNAL OF MENTAL HEALTH NURSING																	Higgins, Oliver/ABD-9586-2021														1445-8330	1447-0349				APR	2025	34	2
J	Mourid, MR; Irfan, H; Oduoye, MO				Mourid, Marina Ramzy; Irfan, Hamza; Oduoye, Malik Olatunde			Artificial Intelligence in Pediatric Epilepsy Detection: Balancing Effectiveness With Ethical Considerations for Welfare	HEALTH SCIENCE REPORTS																	Irfan, Hamza/JVD-8647-2023; Oduoye, Malik Olatunde/AIB-6044-2022	Ramzy Mourid, Marina/0000-0001-7821-500X; Oduoye, Malik Olatunde/0000-0001-9635-9891; Irfan, Hamza/0000-0002-0967-7523														2398-8835				JAN	2025	8	1
J	Mapari, SA; Shrivastava, D; Dave, A; Bedi, GN; Gupta, A; Sachani, P; Kasat, PR; Pradeep, U				Mapari, Smruti A.; Shrivastava, Deepti; Dave, Apoorva; Bedi, Gautam N.; Gupta, Aman; Sachani, Pratiksha; Kasat, Paschyanti R.; Pradeep, Utkarsh			Revolutionizing Maternal Health: The Role of Artificial Intelligence in Enhancing Care and Accessibility	CUREUS JOURNAL OF MEDICAL SCIENCE																																2168-8184				SEP 16	2024	16	9
J	Rad, AA; Vardanyan, R; Athanasiou, T; Maessen, J; Nia, PS				Rad, Arian Arjomandi; Vardanyan, Robert; Athanasiou, Thanos; Maessen, Jos; Nia, Peyman Sardari			The ethical considerations of integrating artificial intelligence into surgery: a review	INTERDISCIPLINARY CARDIOVASCULAR AND THORACIC SURGERY																	Arjomandi Rad, Arian/AAQ-5574-2020; Vardanyan, Robert/HIA-0500-2022	Arjomandi Rad, Arian/0000-0002-4931-4049; Maessen, Jos G/0000-0003-3230-7712														2753-670X				MAR 12	2025	40	3
J	Murire, OT				Murire, Obrain Tinashe			Artificial Intelligence and Its Role in Shaping Organizational Work Practices and Culture	ADMINISTRATIVE SCIENCES																																2076-3387				DEC	2024	14	12
J	Ghiurau, D; Popescu, DE				Ghiurau, David; Popescu, Daniela Elena			Distinguishing Reality from AI: Approaches for Detecting Synthetic Content	COMPUTERS																	Popescu, Daniela/C-7199-2011														2073-431X					JAN	2025	14	1
J	Chalkiadakis, A; Seremetaki, A; Kanellou, A; Kallishi, M; Morfopoulou, A; Moraitaki, M; Mastrokoukou, S				Chalkiadakis, Angelos; Seremetaki, Antonia; Kanellou, Athanasia; Kallishi, Maria; Morfopoulou, Anastasia; Moraitaki, Marina; Mastrokoukou, Sofia			Impact of Artificial Intelligence and Virtual Reality on Educational Inclusion: A Systematic Review of Technologies Supporting Students with Disabilities	EDUCATION SCIENCES																	; Mastrokoukou, Sofia/ABG-3478-2021	Morfopoulou, Anastasia/0009-0009-5488-4220; Mastrokoukou, Sofia/0000-0002-3350-6679														2227-7102				NOV	2024	14	11
J	Najjar, R				Najjar, Reabal			Redefining Radiology: A Review of Artificial Intelligence Integration in Medical Imaging	DIAGNOSTICS																		Najjar, Reabal/0000-0001-7169-7077														2075-4418				SEP	2023	13	17
J	Dazzi, P				Dazzi, Patrizio			The Internet of AI Agents (IAIA): A New Frontier in Networked and Distributed Intelligence	INTERNATIONAL JOURNAL OF NETWORKED AND DISTRIBUTED COMPUTING																	Dazzi, Patrizio/ABD-7124-2021														2211-7938	2211-7946				JUN	2025	13	1
C	Engawi, D; Gere, C; Richards, D		Bruyns, G; Wei, H		Engawi, Duha; Gere, Charlie; Richards, Daniel			The ADI Game: Exploring Futures of Graphic Design and Artificial Intelligence in AI-Driven Autonomous Brands	WITH DESIGN: REINVENTING DESIGN MODES, IASDR 2021					9th Congress of the International-Association-of-Societies-of-Design-Research (IASDR)	DEC 05-09, 2021	Hong Kong, HONG KONG																										978-981-19-4474-1; 978-981-19-4472-7; 978-981-19-4471-0				2022
J	Biondi-Zoccai, G; D'Ascenzo, F; Giordano, S; Mirzoyev, U; Erol,Ç; Cenciarelli, S; Leone, P; Versaci, F				Biondi-Zoccai, Giuseppe; D'Ascenzo, Fabrizio; Giordano, Salvatore; Mirzoyev, Ulvi; Erol, Cetin; Cenciarelli, Sabrina; Leone, Pietro; Versaci, Francesco			Artificial Intelligence in Cardiology: General Perspectives and Focus on Interventional Cardiology	ANATOLIAN JOURNAL OF CARDIOLOGY																	D'Ascenzo, Fabrizio/D-2447-2012; Erol, Cetin/AAS-8128-2020														2149-2263	2149-2271				APR	2025	29	4
J	Cheungpasitporn, W; Thongprayoon, C; Kashani, KB				Cheungpasitporn, Wisit; Thongprayoon, Charat; Kashani, Kianoush B.			Artificial Intelligence in Heart Failure and Acute Kidney Injury: Emerging Concepts and Controversial Dimensions	CARDIORENAL MEDICINE																	Thongprayoon, Charat/J-4184-2019; Cheungpasitporn, Wisit/H-8194-2019														1664-3828	1664-5502					2024	14	1
J	Swaminathan, U; Daigavane, S				Swaminathan, Uma; Daigavane, Sachin			Unveiling the Potential: A Comprehensive Review of Artificial Intelligence Applications in Ophthalmology and Future Prospects	CUREUS JOURNAL OF MEDICAL SCIENCE																	daigavane, sachin/AAZ-6424-2020															2168-8184				JUN 6	2024	16	6
J	Agrawal, J; Arafat, MY				Agrawal, Juhi; Arafat, Muhammad Yeasir			Transforming Farming: A Review of AI-Powered UAV Technologies in Precision Agriculture	DRONES																	Arafat, Muhammad Yeasir/T-9787-2019	Arafat, Muhammad Yeasir/0000-0003-2713-8248														2504-446X				NOV	2024	8	11
J	Zong, ZJ; Guan, Y				Zong, Zhijuan; Guan, Yu			AI-Driven Intelligent Data Analytics and Predictive Analysis in Industry 4.0: Transforming Knowledge, Innovation, and Efficiency	JOURNAL OF THE KNOWLEDGE ECONOMY																															1868-7865	1868-7873				2024 MAY 8	2024
J	Thakuria, T; Rahman, T; Mahanta, DR; Khataniar, SK; Goswami, RD; Rahman, T; Mahanta, LB				Thakuria, Tapabrat; Rahman, Taibur; Mahanta, Deva Raj; Khataniar, Sanjib Kumar; Goswami, Rahul Dev; Rahman, Tashnin; Mahanta, Lipi B.			Deep learning for early diagnosis of oral cancer via smartphone and DSLR image analysis: a systematic review	EXPERT REVIEW OF MEDICAL DEVICES																	Mahanta, Lipi/R-6375-2019	Mahanta, Lipi B./0000-0002-7733-5461; Rahman, Taibur/0009-0005-4281-0559													1743-4440	1745-2422				DEC 1	2024	21	12
J	Dehbozorgi, R; Zangeneh, S; Khooshab, E; Nia, DH; Hanif, HR; Samian, P; Yousefi, M; Hashemi, FH; Vakili, M; Jamalimoghadam, N; Lohrasebi, F				Dehbozorgi, Raziye; Zangeneh, Sanaz; Khooshab, Elham; Nia, Donya Hafezi; Hanif, Hamid Reza; Samian, Pooya; Yousefi, Mahmoud; Hashemi, Fatemeh Haj; Vakili, Morteza; Jamalimoghadam, Neda; Lohrasebi, Fatemeh			The application of artificial intelligence in the field of mental health: a systematic review	BMC PSYCHIATRY																	Hanif, Hamid Reza/K-8714-2014; khooshab, elham/AAS-1336-2021; Jamalimoghadam, Neda/P-8899-2018															1471-244X				FEB 14	2025	25	1
J	Junaid, MAL				Junaid, Mohammed Abdul Lateef			Artificial intelligence driven innovations in biochemistry: A review of emerging research frontiers	BIOMOLECULES AND BIOMEDICINE																															2831-0896	2831-090X				2025 JAN 14	2025
J	Brodsky, V; Ullah, E; Bychkov, A; Song, AH; Walk, EE; Louis, P; Rasool, G; Singh, RS; Mahmood, F; Bui, MM; Parwani, AV				Brodsky, Victor; Ullah, Ehsan; Bychkov, Andrey; Song, Andrew H.; Walk, Eric E.; Louis, Peter; Rasool, Ghulam; Singh, Rajendra S.; Mahmood, Faisal; Bui, Marilyn M.; V. Parwani, Anil			Generative Artificial Intelligence in Anatomic Pathology	ARCHIVES OF PATHOLOGY & LABORATORY MEDICINE																	Ullah, Ehsan/J-3669-2019; Rasool, Ghulam/T-7960-2019; Bychkov, Andrey/N-1884-2019	Ullah, Ehsan/0000-0001-6470-3731; Parwani, Anil/0009-0007-7224-6682; Bychkov, Andrey/0000-0002-4203-5696													0003-9985	1543-2165				APR	2025	149	4
J	Dote-Pardo, JS; Cordero-Díaz, MC; Jaramillo, MTE; Parra-Domínguez, J				Dote-Pardo, Jairo Stefano; Cordero-Diaz, Marling Carolina; Jaramillo, Maria Teresa Espinosa; Parra-Dominguez, Javier			Leveraging artificial intelligence for enhanced decision-making in finance: trends and future directions	JOURNAL OF ACCOUNTING LITERATURE																	Dote-Pardo, Jairo/HLX-8715-2023; Parra, Javier/ABE-5866-2021	Dote Pardo, Jairo Stefano/0000-0001-9609-0407													0737-4607	2452-1469				2025 APR 3	2025
J	Al-Akayleh, F; Agha, ASAA; Rahem, RAA; Al-Remawi, M				Al-Akayleh, Faisal; Ali Agha, Ahmed S. A.; Rahem, Rami A. Abdel; Al-Remawi, Mayyas			A mini review on the applications of artificial intelligence (AI) in surface chemistry and catalysis	TENSIDE SURFACTANTS DETERGENTS																	Ali Agha, Ahmed/AFF-3025-2022; Al-Akayleh, Faisal/D-9698-2017	Ali Agha, Ahmed Saad Abdulbari/0009-0000-8516-2313													0932-3414	2195-8564				JUL 26	2024	61	4
J	Kodumuru, R; Sarkar, S; Parepally, V; Chandarana, J				Kodumuru, Reshma; Sarkar, Soumavo; Parepally, Varun; Chandarana, Jignesh			Artificial Intelligence and Internet of Things Integration in Pharmaceutical Manufacturing: A Smart Synergy	PHARMACEUTICS																																1999-4923				FEB 22	2025	17	3
J	Xu, XS; Su, YJ; Zhang, YF; Wu, YY; Xu, XY				Xu, Xiaoshu; Su, Yujie; Zhang, Yunfeng; Wu, Yunyang; Xu, Xinyu			Understanding learners' perceptions of ChatGPT: A thematic analysis of peer interviews among undergraduates and postgraduates in China	HELIYON																	Xu, Xinyu/JVO-7906-2024; Su, Yujie/AAC-5213-2022	Zhang, Yunfeng/0000-0002-9995-8432; Xu, Xinyu/0000-0002-2473-6157; Su, Yujie/0000-0003-1444-1598; xu, xiaoshu/0000-0002-0667-4511														2405-8440				FEB 29	2024	10	4
J	Naskar, S; Sharma, S; Kuotsu, K; Halder, S; Pal, G; Saha, S; Mondal, S; Biswas, UK; Jana, M; Bhattacharjee, S				Naskar, Sweet; Sharma, Suraj; Kuotsu, Ketousetuo; Halder, Suman; Pal, Goutam; Saha, Subhankar; Mondal, Shubhadeep; Biswas, Ujjwal Kumar; Jana, Mayukh; Bhattacharjee, Sunirmal			The biomedical applications of artificial intelligence: an overview of decades of research	JOURNAL OF DRUG TARGETING																	Naskar, S/LZI-4701-2025	Naskar, Dr. Sweet/0009-0009-6983-5130; BISWAS, UJJWAL KUMAR/0009-0001-7020-7352													1061-186X	1029-2330				2024 DEC 31	2024
J	Sedano, R; Solitano, V; Vuyyuru, SK; Yuan, YH; Hanzel, J; Ma, C; Nardone, OM; Jairath, V				Sedano, Rocio; Solitano, Virginia; Vuyyuru, Sudheer K.; Yuan, Yuhong; Hanzel, Jurij; Ma, Christopher; Nardone, Olga Maria; Jairath, Vipul			Artificial intelligence to revolutionize IBD clinical trials: a comprehensive review	THERAPEUTIC ADVANCES IN GASTROENTEROLOGY																	Nardone, Olga/AAW-4573-2021; Jairath, Vipul/GLS-6449-2022; Hanzel, Jurij/AAY-6142-2020; Ma, Christopher/AAH-4886-2021; Yuan, Yuhong/AAB-3227-2019	Solitano, Virginia/0000-0002-2935-6778; Hanzel, Jurij/0000-0003-3158-8014; Ma, Christopher/0000-0002-4698-9948; Yuan, Yuhong/0000-0003-4374-3042														1756-2848					2025	18
J	Danach, K; El Dirani, A; Rkein, H				Danach, Kassem; El Dirani, Ali; Rkein, Hassan			Revolutionizing Supply Chain Management With AI: A Path to Efficiency and Sustainability	IEEE ACCESS																	danach, kassem/KXS-0016-2024														2169-3536						2024	12
C	Faccia, A; Ridon, M; Beebeejaun, Z; Mosteanu, NR			Assoc Computing Machinery	Faccia, Alessio; Ridon, Manjeet; Beebeejaun, Zeenat; Mosteanu, Narcisa Roxana			Advancements and Challenges of Generative AI in Higher Educational Content Creation A Technical Perspective	8TH INTERNATIONAL CONFERENCE ON INFORMATION SYSTEMS ENGINEERING, ICISE 2023					8th International Conference on Information Systems Engineering (ICISE)	DEC 16-18, 2023	Bangkok, THAILAND										Faccia, Alessio/GXG-9710-2022	FACCIA, ALESSIO/0000-0001-7231-6774															979-8-4007-0917-3				2023
J	Abdulameer, L; Al-Khafaji, MS; Al-Awadi, AT; Al Maimuri, NML; Al-Shammari, M; Al-Dujaili, AN; DhiyaAl-Jumeily				Abdulameer, Layth; Al-Khafaji, Mahmoud Saleh; Al-Awadi, Aysar Tuma; Al Maimuri, Najah M. L.; Al-Shammari, Musa; Al-Dujaili, Ahmed N.; DhiyaAl-Jumeily			Artificial Intelligence in Climate-Resilient Water Management: A Systematic Review of Applications, Challenges, and Future Directions	WATER CONSERVATION SCIENCE AND ENGINEERING																															2366-3340	2364-5687				APR	2025	10	1
J	Stalp, JL; Denecke, A; Jentschke, M; Hillemanns, P; Klapdor, R				Stalp, Jan Lennart; Denecke, Agnieszka; Jentschke, Matthias; Hillemanns, Peter; Klapdor, Ruediger			Quality of ChatGPT-Generated Therapy Recommendations for Breast Cancer Treatment in Gynecology	CURRENT ONCOLOGY																	Klapdor, Rüdiger/AAV-1672-2021	Stalp, Jan Lennart/0000-0002-8577-8940													1198-0052	1718-7729				JUL	2024	31	7
J	Valente, DS; Brasil, LJ; Spinelli, LD; Vilela, MAP; Rhoden, EL				Valente, Denis Souto; Brasil, Luis Josino; Spinelli, Leandro de Freitas; Vilela, Manuel Augusto Pereira; Rhoden, Ernani Luis			A narrative review of transforming surgical education with artificial intelligence: opportunities and challenges	AME SURGICAL JOURNAL																	Vilela, Manuel/P-2941-2014; Valente, Denis/AAP-8806-2021															2788-578X				FEB 28	2025	5
J	Hojeij, Z; Kuhail, MA; El Sayary, A				Hojeij, Zeina; Kuhail, Mohammad Amin; El Sayary, Areej			Investigating in-service teachers' views on ChatGPT integration	INTERACTIVE TECHNOLOGY AND SMART EDUCATION																	ElSayary, Areej/ABH-4270-2022; Kuhail, Mohammad/AAS-6745-2020; Hojeij, Zeina/AAM-8239-2021														1741-5659	1758-8510				2024 JUL 29	2024
J	Puscasu, A; Gherghiceanu, F; Andronic, O				Puscasu, Andreea; Gherghiceanu, Florentina; Andronic, Octavian			THE USE OF ARTIFICIAL INTELLIGENCE IN DRUG DISCOVERY: FROM CONCEPT TO CURRENT APPLICATIONS	FARMACIA																	Andronic, Octavian/AAO-8967-2020														0014-8237	2065-0019				JAN-FEB	2025	73	1
J	Goktas, P; Grzybowski, A				Goktas, Polat; Grzybowski, Andrzej			Shaping the Future of Healthcare: Ethical Clinical Challenges and Pathways to Trustworthy AI	JOURNAL OF CLINICAL MEDICINE																	Goktas, Polat/JRW-9094-2023; Grzybowski, A/E-4486-2010	Grzybowski, Andrzej/0000-0002-3724-2391; GOKTAS, POLAT/0000-0001-7183-6890														2077-0383				MAR	2025	14	5
J	Gonsalves, C				Gonsalves, Chahna			Generative AI's Impact on Critical Thinking: Revisiting Bloom's Taxonomy	JOURNAL OF MARKETING EDUCATION																		Gonsalves, Chahna/0000-0002-3516-4297													0273-4753	1552-6550				2024 DEC 23	2024
J	Bernal, MC; Batista, E; Martinez-Ballesté, A; Solanas, A				Bernal, Mary Carlota; Batista, Edgar; Martinez-Balleste, Antoni; Solanas, Agusti			Artificial intelligence for the study of human ageing: a systematic literature review	APPLIED INTELLIGENCE																	Batista, Edgar/GRO-2055-2022; Solanas, Agusti/A-1441-2014; Martinez-Balleste, Antoni/I-4142-2015; Bernal, Mary Carlota/F-8022-2018	Solanas, Agusti/0000-0002-4881-6215; Martinez-Balleste, Antoni/0000-0002-1787-7410; Bernal, Mary Carlota/0000-0001-7565-2909													0924-669X	1573-7497				NOV	2024	54	22
J	Sheikh, A; Simske, SJ; Chong, EKP				Sheikh, Arifuzzaman (Arif); Simske, Steven J.; Chong, Edwin K. P.			Evaluating Artificial Intelligence Models for Resource Allocation in Circular Economy Digital Marketplace	SUSTAINABILITY																	Cheng, T./D-5688-2015; Chong, Edwin/A-3053-2008	Chong, Edwin/0000-0002-7622-4815; Sheikh, Arifuzzaman (Arif)/0000-0001-6786-9884; Simske, Steven/0000-0002-6937-1956														2071-1050				DEC	2024	16	23
J	Azmi, S; Kunnathodi, F; Alotaibi, HF; Alhazzani, W; Mustafa, M; Ahmad, I; Anvarbatcha, R; Lytras, MD; Arafat, AA				Azmi, Sarfuddin; Kunnathodi, Faisal; Alotaibi, Haifa F.; Alhazzani, Waleed; Mustafa, Mohammad; Ahmad, Ishtiaque; Anvarbatcha, Riyasdeen; Lytras, Miltiades D.; Arafat, Amr A.			Harnessing Artificial Intelligence in Obesity Research and Management: A Comprehensive Review	DIAGNOSTICS																	Kunnathodi, Faisal/ABA-5558-2021; Azmi, Sarfuddin/AAE-7602-2022; Alhazzani, Waleed/IZD-7179-2023; Arafat, Amr/I-5274-2019; Lytras, Miltiadis/P-8195-2016	Arafat, Amr/0000-0003-0951-7287; Lytras, Miltiadis/0000-0002-7281-5458														2075-4418				FEB	2025	15	3
J	Rawas, S; Tafran, C; AlSaee, D; Al-Ghreimil, N				Rawas, Soha; Tafran, Cerine; AlSaee, Duaa; Al-Ghreimil, Nadia			Transforming Healthcare: AI-NLP Fusion Framework for Precision Decision-Making and Personalized Care Optimization in the Era of IoMT	CMC-COMPUTERS MATERIALS & CONTINUA																	alSaeed, Duaa/AAU-9469-2020; Alghreimil, Nadia/AAZ-4331-2021														1546-2218	1546-2226					2024	81	3
J	Rudroff, T; Rainio, O; Klen, R				Rudroff, Thorsten; Rainio, Oona; Klen, Riku			Leveraging Artificial Intelligence to Optimize Transcranial Direct Current Stimulation for Long COVID Management: A Forward-Looking Perspective	BRAIN SCIENCES																	Klen, Riku/G-4339-2016	Klen, Riku/0000-0002-0982-8360; Rainio, Oona/0000-0002-7775-7656; Rudroff, T/0000-0002-2057-7793														2076-3425				AUG	2024	14	8
J	Sukums, F; Mzurikwao, D; Sabas, D; Chaula, R; Mbuke, J; Kabika, T; Kaswija, J; Ngowi, B; Noll, J; Winkler, AS; Andersson, SW				Sukums, Felix; Mzurikwao, Deogratias; Sabas, Deodatus; Chaula, Rebecca; Mbuke, Juliana; Kabika, Twaha; Kaswija, John; Ngowi, Bernard; Noll, Josef; Winkler, Andrea S.; Andersson, Sarah Wamala			The use of artificial intelligence-based innovations in the health sector in Tanzania: A scoping review	HEALTH POLICY AND TECHNOLOGY																	MZURIKWO, DEOGRATIAS/AAP-2837-2020; Sabas, Deodatus/GWZ-1537-2022; Sukums, Felix/AAQ-5559-2021	Sabas, Deodatus/0000-0002-0302-7087; Chaula, Rebecca Beldon/0000-0001-9812-6602; Noll, Josef/0000-0002-8168-5552; Sukums, Felix/0000-0001-5872-3832													2211-8837					MAR	2023	12	1
J	Nag, A; Mishra, S				Nag, Aditi; Mishra, Smriti			Revitalizing Mining Heritage Tourism: A Machine Learning Approach to Tourism Management	JOURNAL OF MINING AND ENVIRONMENT																	Nag, Aditi/AFB-4864-2022	Nag, Aditi/0000-0002-0604-6945													2251-8592	2251-8606					2024	15	4
J	Kumar, A; Aravind, N; Gillani, T; Kumar, D				Kumar, Anil; Aravind, Nikhil; Gillani, Tayiba; Kumar, Deepak			Artificial intelligence breakthrough in diagnosis, treatment, and prevention of colorectal cancer - A comprehensive review	BIOMEDICAL SIGNAL PROCESSING AND CONTROL																															1746-8094	1746-8108				MAR	2025	101
J	Li, F; Wang, SG; Gao, Z; Qing, MF; Pan, S; Liu, YY; Hu, CC				Li, Fang; Wang, Shengguo; Gao, Zhi; Qing, Maofeng; Pan, Shan; Liu, Yingying; Hu, Chengchen			Harnessing artificial intelligence in sepsis care: advances in early detection, personalized treatment, and real-time monitoring	FRONTIERS IN MEDICINE																	Hu, Chengchen/KIB-8527-2024															2296-858X				JAN 6	2025	11
J	Subrata, SA				Subrata, Sumarno Adi			The Role of Artificial Intelligence in Chronic Illness Care: Navigating Challenges in Clinical Nursing Practice	PACIFIC RIM INTERNATIONAL JOURNAL OF NURSING RESEARCH																	Adi Subrata, PhD, Sumarno/AAH-9856-2019	Adi Subrata, PhD, Sumarno/0000-0003-2156-3374													1906-8107					APR-JUN	2025	29	2
J	Chun, J; Kim, J; Kim, H; Lee, G; Cho, S; Kim, C; Chung, Y; Heo, S				Chun, Jiyong; Kim, Jeongsoo; Kim, Hyejin; Lee, Geumgu; Cho, Sanggoo; Kim, Changshik; Chung, Yeesook; Heo, Seoyoon			A Comparative Analysis of On-Device AI-Driven, Self-Regulated Learning and Traditional Pedagogy in University Health Sciences Education	APPLIED SCIENCES-BASEL																	Heo, Seoyoon/ACL-4933-2022															2076-3417				FEB	2025	15	4
J	Adeniran, OT; Ojeme, B; Ajibola, TE; Peter, OOE; Ajala, AO; Rahman, MM; Khalifa, F				Adeniran, Opeyemi Taiwo; Ojeme, Blessing; Ajibola, Temitope Ezekiel; Peter, Ojonugwa Oluwafemi Ejiga; Ajala, Abiola Olayinka; Rahman, Md Mahmudur; Khalifa, Fahmi			Explainable MRI-Based Ensemble Learnable Architecture for Alzheimer's Disease Detection	ALGORITHMS																	Khalifa, Fahmi/I-5663-2018	Khalifa, Fahmi/0000-0003-3318-2851														1999-4893				MAR 13	2025	18	3
J	Taylor, RA; Sangal, RB; Smith, ME; Haimovich, AD; Rodman, A; Iscoe, MS; Pavuluri, SK; Rose, C; Janke, AT; Wright, DS; Socrates, V; Declan, A				Taylor, R. Andrew; Sangal, Rohit B.; Smith, Moira E.; Haimovich, Adrian D.; Rodman, Adam; Iscoe, Mark S.; Pavuluri, Suresh K.; Rose, Christian; Janke, Alexander T.; Wright, Donald S.; Socrates, Vimig; Declan, Arwen			Leveraging artificial intelligence to reduce diagnostic errors in emergency medicine: Challenges, opportunities, and future directions	ACADEMIC EMERGENCY MEDICINE																	Haimovich, Adrian/IUQ-7998-2023; Rose, Christian/AAP-2569-2021	Janke, Alexander/0000-0003-1181-714X; /0000-0002-9082-6644; Wright, Donald/0000-0002-2564-7754; Declan, Arwen/0000-0002-8757-8950; Iscoe, Mark/0000-0003-4446-2488; Rose, Christian/0000-0002-5115-649X													1069-6563	1553-2712				MAR	2025	32	3
J	Mallik, S; Gangopadhyay, A				Mallik, Sruti; Gangopadhyay, Ahana			Proactive and reactive engagement of artificial intelligence methods for education: a review	FRONTIERS IN ARTIFICIAL INTELLIGENCE																	Mallik, Sruti/GOP-1102-2022; Gangopadhyay, Ahana/GNM-7193-2022															2624-8212				MAY 5	2023	6
J	Fatima, SS; Sheikh, NA; Osama, A				Fatima, Syeda Sadia; Sheikh, Nabeel Ashfaque; Osama, Athar			Authentic assessment in medical education: exploring AI integration and student-as-partners collaboration	POSTGRADUATE MEDICAL JOURNAL																		Sheikh, Nabeel Ashfaque/0009-0001-1265-2546; Fatima, Syeda Sadia/0000-0002-3164-0225													0032-5473	1469-0756				JUL 23	2024	100	1190
J	Olawade, DB; Weerasinghe, K; Mathugamage, MDDE; Odetayo, A; Aderinto, N; Teke, J; Boussios, S				Olawade, David B.; Weerasinghe, Kusal; Mathugamage, Mathugamage Don Dasun Eranga; Odetayo, Aderonke; Aderinto, Nicholas; Teke, Jennifer; Boussios, Stergios			Enhancing Ophthalmic Diagnosis and Treatment with Artificial Intelligence	MEDICINA-LITHUANIA																	Olawade, David/AAF-9929-2021; Boussios, Stergios/AAH-2933-2019	Boussios, Stergios/0000-0002-2512-6131; Olawade, David Bamidele/0000-0003-0188-9836													1010-660X	1648-9144				FEB 28	2025	61	3
J	Garikapati, D; Shetiya, SS				Garikapati, Divya; Shetiya, Sneha Sudhir			Autonomous Vehicles: Evolution of Artificial Intelligence and the Current Industry Landscape	BIG DATA AND COGNITIVE COMPUTING																	, Sneha Sudhir/KBA-4532-2024; Garikapati, Divya/JFS-4860-2023	, Sneha Sudhir/0009-0002-1779-5754; Garikapati, Divya/0009-0002-2171-9623														2504-2289				APR	2024	8	4
J	Pang, WN; Wei, Z				Pang, Weina; Wei, Zhe			Shaping the Future of Higher Education: A Technology Usage Study on Generative AI Innovations	INFORMATION																																2078-2489				FEB	2025	16	2
J	Adel, A				Adel, Amr			The Convergence of Intelligent Tutoring, Robotics, and IoT in Smart Education for the Transition from Industry 4.0 to 5.0	SMART CITIES																	Adel, Amr/IAR-2773-2023	Adel, Amr/0000-0002-0632-0940														2624-6511				FEB	2024	7	1
J	Nedungadi, P; Surendran, S; Tang, KY; Raman, R				Nedungadi, Prema; Surendran, Simi; Tang, Kai-Yu; Raman, Raghu			Big Data and AI Algorithms for Sustainable Development Goals: A Topic Modeling Analysis	IEEE ACCESS																	Raman, Raghu/AAL-9550-2020; Tang, Kai-Yu/J-2568-2016	Tang, Kai-Yu/0000-0002-3965-3055; Nedungadi, Prema/0000-0001-8774-3541													2169-3536						2024	12
J	Ajmal, CS; Yerram, S; Abishek, V; Nizam, VPM; Aglave, G; Patnam, JD; Raghuvanshi, RS; Srivastava, S				Ajmal, C. S.; Yerram, Sravani; Abishek, V.; Nizam, V. P. Muhammed; Aglave, Gayatri; Patnam, Jayasri Devi; Raghuvanshi, Rajeev Singh; Srivastava, Saurabh			Innovative Approaches in Regulatory Affairs: Leveraging Artificial Intelligence and Machine Learning for Efficient Compliance and Decision-Making	AAPS JOURNAL																	Srivastava, Dr Saurabh/GWD-0786-2022	Srivastava, Saurabh/0000-0003-0723-4363													1550-7416					JAN 7	2025	27	1
J	Abbasi, BN; Wu, YQ; Luo, ZM				Abbasi, Babar Nawaz; Wu, Yingqi; Luo, Zhimin			Exploring the impact of artificial intelligence on curriculum development in global higher education institutions	EDUCATION AND INFORMATION TECHNOLOGIES																		ABBASI, BABAR NAWAZ/0000-0002-2298-339X													1360-2357	1573-7608				JAN	2025	30	1
J	Rashid, HU; Jeong, SH				Rashid, Harun Ur; Jeong, Seong Ho			AI empowered 6G technologies and network layers: Recent trends, opportunities, and challenges	EXPERT SYSTEMS WITH APPLICATIONS																															0957-4174	1873-6793				APR 1	2025	267
J	Kakkar, P; Gupta, S; Paschopoulou, KI; Paschopoulos, I; Paschopoulos, I; Siafaka, V; Tsonis, O				Kakkar, Pragati; Gupta, Shruti; Paschopoulou, Kasmiria Ioanna; Paschopoulos, Ilias; Paschopoulos, Ioannis; Siafaka, Vassiliki; Tsonis, Orestis			The integration of artificial intelligence in assisted reproduction: a comprehensive review	FRONTIERS IN REPRODUCTIVE HEALTH																																2673-3153				MAR 20	2025	7
J	Freeman, S; Stewart, J; Kaard, R; Ouliel, E; Goudie, A; Dwivedi, G; Akhlaghi, H				Freeman, Sam; Stewart, Jonathon; Kaard, Rebecca; Ouliel, Eden; Goudie, Adrian; Dwivedi, Girish; Akhlaghi, Hamed			Health consumers' ethical concerns towards artificial intelligence in Australian emergency departments	EMERGENCY MEDICINE AUSTRALASIA																	Akhlaghi, Hamed/JXL-6777-2024	Dwivedi, Girish/0000-0003-0717-740X; Freeman, Sam/0000-0002-8193-6454; Goudie, Adrian/0000-0003-0176-1533; Akhlaghi, Hamed/0000-0002-3929-7265; Stewart, Jonathon/0000-0002-7322-0106													1742-6731	1742-6723				OCT	2024	36	5
J	Ambreen, S; Umar, M; Noor, A; Jain, H; Ali, R				Ambreen, Subiya; Umar, Mohammad; Noor, Aaisha; Jain, Himangini; Ali, Ruhi			Advanced AI and ML frameworks for transforming drug discovery and optimization: With innovative insights in polypharmacology, drug repurposing, combination therapy and nanomedicine	EUROPEAN JOURNAL OF MEDICINAL CHEMISTRY																															0223-5234	1768-3254				FEB 15	2025	284
J	Salami, FO; Muzammel, M; Mourchid, Y; Othmani, A				Salami, Fati Oiza; Muzammel, Muhammad; Mourchid, Youssef; Othmani, Alice			Artificial Intelligence non-invasive methods for neonatal jaundice detection: A review	ARTIFICIAL INTELLIGENCE IN MEDICINE																	Mourchid, Youssef/AAK-3314-2021	MOURCHID, Youssef/0000-0003-4108-4557; OTHMANI, Alice/0000-0002-3442-0578													0933-3657	1873-2860				APR	2025	162
C	Farsath, KR; Jitha, K; Marwan, VKM; Jouhar, AMA; Farseen, KPM; Musrifa, KA			IEEE	Farsath, Rashida K.; Jitha, K.; Marwan, Mohammed V. K.; Jouhar, Muhammed Ali A.; Farseen, Muhammed K. P.; Musrifa, K. A.			AI-Enhanced Unmanned Aerial Vehicles for Search and Rescue Operations	2024 5TH INTERNATIONAL CONFERENCE ON INNOVATIVE TRENDS IN INFORMATION TECHNOLOGY, ICITIIT 2024					5th International Conference on Innovative Trends in Information Technology (ICITIIT)	MAR 15-16, 2024	Kottayam, INDIA																										979-8-3503-8681-3; 979-8-3503-8682-0				2024
J	Lartey, D; Law, KMY				Lartey, Desmond; Law, Kris M. Y.			Artificial intelligence adoption in urban planning governance: A systematic review of advancements in decision-making, and policy making	LANDSCAPE AND URBAN PLANNING																	Law, Kris/G-5221-2012; Lartey, Desmond/KXR-4095-2024														0169-2046	1872-6062				JUN	2025	258
J	Rädel-Ablass, K; Schliz, K; Schlick, C; Meindl, B; Pahr-Hosbach, S; Schwendemann, H; Rupp, S; Roddewig, M; Miersch, C				Raedel-Ablass, Katharina; Schliz, Klaus; Schlick, Cornelia; Meindl, Benjamin; Pahr-Hosbach, Sandra; Schwendemann, Hanna; Rupp, Stephanie; Roddewig, Marion; Miersch, Claudia			Teaching opportunities for anamnesis interviews through AI based teaching role plays: a survey with online learning students from health study programs	BMC MEDICAL EDUCATION																																1472-6920				FEB 18	2025	25	1
C	Sottilare, RA		Sottilare, RA; Schwarz, J		Sottilare, Robert A.			Examining the Role of Knowledge Management in Adaptive Military Training Systems	ADAPTIVE INSTRUCTIONAL SYSTEMS, AIS 2024	Lecture Notes in Computer Science				6th International Conference on Adaptive Instructional Systems (AIS) Held as Part of the 26th International Conference on Human-Computer Interaction (HCII)	JUN 29-JUL 04, 2024	Washington, DC										Sottilare, Robert/AAH-2200-2020														0302-9743	1611-3349	978-3-031-60608-3; 978-3-031-60609-0				2024	14727
J	Pradhan, T; Gupta, O; Chawla, G				Pradhan, Tathagata; Gupta, Ojasvi; Chawla, Gita			The Future of ChatGPT in Medicinal Chemistry: Harnessing AI for Accelerated Drug Discovery	CHEMISTRYSELECT																		Chawla, Dr. Gita/0000-0003-1745-9697; Pradhan, Tathagata/0000-0001-7407-0819													2365-6549					APR 4	2024	9	13
J	Bozkurt, A				Bozkurt, Aras			GenAI et al.: Cocreation, Authorship, Ownership, Academic Ethics and Integrity in a Time of Generative AI	OPEN PRAXIS																	Bozkurt, Aras/O-3654-2017	Bozkurt, Aras/0000-0002-4520-642X													2304-070X						2024	16	1
J	Dabla, PK				Dabla, Pradeep Kumar			Unlocking new potential of clinical diagnosis with artificial intelligence: Finding new patterns of clinical and lab data	WORLD JOURNAL OF DIABETES																																1948-9358				MAR 15	2024	15	3
J	Berry, P; Dhanakshirur, RR; Khanna, S				Berry, Parul; Dhanakshirur, Rohan Raju; Khanna, Sahil			Utilizing large language models for gastroenterology research: a conceptual framework	THERAPEUTIC ADVANCES IN GASTROENTEROLOGY																																1756-2848					2025	18
J	Hameed, BS; Krishnan, UM				Hameed, Bahrudeen Shahul; Krishnan, Uma Maheswari			Artificial Intelligence-Driven Diagnosis of Pancreatic Cancer	CANCERS																																2072-6694				NOV	2022	14	21
J	Dhal, SB; Kar, D				Dhal, Sambandh Bhusan; Kar, Debashish			Leveraging artificial intelligence and advanced food processing techniques for enhanced food safety, quality, and security: a comprehensive review	DISCOVER APPLIED SCIENCES																	Dhal, Sambandh/HLG-3042-2023															3004-9261				JAN 11	2025	7	1
C	Botunac, I; Parlov, N; Bosna, J			IEEE	Botunac, Ive; Parlov, Natalija; Bosna, Jurica			Opportunities of Gen AI in the Banking Industry with regards to the AI Act, GDPR, Data Act and DORA	2024 13TH MEDITERRANEAN CONFERENCE ON EMBEDDED COMPUTING, MECO 2024	Mediterranean Conference on Embedded Computing				13th Mediterranean Conference on Embedded Computing (MECO)	JUN 11-14, 2024	Budva, MONTENEGRO	IEEE									Botunac, Ive/AAQ-1187-2020; Bosna, Jurica/ABD-7866-2020	Parlov, Natalija/0000-0002-8468-7465; Botunac, Ive/0000-0003-3561-7089													2377-5475		979-8-3503-8756-8; 979-8-3503-8757-5				2024
J	Pennisi, F; Pinto, A; Ricciardi, GE; Signorelli, C; Gianfredi, V				Pennisi, Flavia; Pinto, Antonio; Ricciardi, Giovanni Emanuele; Signorelli, Carlo; Gianfredi, Vincenza			The Role of Artificial Intelligence and Machine Learning Models in Antimicrobial Stewardship in Public Health: A Narrative Review	ANTIBIOTICS-BASEL																	Ricciardi, Giovanni Emanuele/JBR-8181-2023; Gianfredi, Vincenza/W-1408-2017	Pinto, Antonio/0009-0006-4315-0481; Gianfredi, Vincenza/0000-0003-3848-981X; Pennisi, Flavia/0009-0001-9185-9747													2079-6382					FEB	2025	14	2
J	Ivanytska, N; Koliasa, O; Kovalevska, T; Matsera, O; Tkachuk, T				Ivanytska, Natalia; Koliasa, Olena; Kovalevska, Tetiana; Matsera, Olha; Tkachuk, Tetiana			Analyzing the Possibilities of Implementation of AI and Social Networks in Teaching Foreign Language Students: Ukrainian Universities Case Study	ARAB WORLD ENGLISH JOURNAL																	Koliasa, Olena/AAG-2538-2021; Ivanytska, Natalia/AAE-8254-2022; Tkachuk, Tetiana/ABB-1972-2020	Ivanytska, Natalia/0000-0002-9925-1285; Koliasa, Olena/0000-0001-5301-480X; Tkachuk, Tetiana/0000-0002-4223-269X													2229-9327					APR	2024
J	Gawande, MS; Zade, N; Kumar, P; Gundewar, S; Weerarathna, IN; Verma, P				Gawande, Mayur Suresh; Zade, Nikita; Kumar, Praveen; Gundewar, Swapnil; Weerarathna, Induni Nayodhara; Verma, Prateek			The role of artificial intelligence in pandemic responses: from epidemiological modeling to vaccine development	MOLECULAR BIOMEDICINE																	Kumar, Praveen/KSL-8388-2024; Weerarathna, Induni/KIE-5209-2024	Kumar, Praveen/0000-0002-8319-1572; Weerarathna, Induni Nayodhara/0009-0007-6996-8270														2662-8651				JAN 3	2025	6	1
J	Cooper, G; Tang, KS; Fitzgerald, A				Cooper, Grant; Tang, Kok-Sing; Fitzgerald, Angela			Intersections of Mind and Machine: Navigating the Nexus of Artificial Intelligence, Science Education, and the Preparation of Pre-service Teachers	JOURNAL OF SCIENCE EDUCATION AND TECHNOLOGY																	Tang, Kok-Sing/I-3245-2019														1059-0145	1573-1839				2025 FEB 10	2025
J	Dimri, A; Kumar, P; Garg, D				Dimri, Anjali; Kumar, Pankaj; Garg, Deepshi			Exploring job embeddedness in the era of artificial intelligence (AI) and machine learning: a bibliometric analysis and future trends	BENCHMARKING-AN INTERNATIONAL JOURNAL																															1463-5771	1758-4094				2025 APR 14	2025
J	Gohil, ZM; Desai, MB				Gohil, Zinal M.; Desai, Madhavi B.			Revolutionizing Dermatology: A Comprehensive Survey of AI-Enhanced Early Skin Cancer Diagnosis	ARCHIVES OF COMPUTATIONAL METHODS IN ENGINEERING																		desai, Madhavi/0000-0002-8922-8364; Gohil, Zinal/0009-0004-1497-8920													1134-3060	1886-1784				DEC	2024	31	8
J	Bhatt, AN; Sengupta, S; Abolhassani, A; Brower, D; Forehand, C; Keats, K; Kwon, Y; Healy, WJ				Bhatt, Arjun N.; Sengupta, Sohawm; Abolhassani, Ali; Brower, David; Forehand, Christy; Keats, Kelli; Kwon, Younghoon; Healy, William J.			Awakening Sleep Medicine: The Transformative Role of Artificial Intelligence in Sleep Health	CURRENT SLEEP MEDICINE REPORTS																																2198-6401				MAR 12	2025	11	1
J	Wong, AKC; Lee, JHT; Zhao, Y; Lu, Q; Yang, SL; Hui, VCC				Wong, Arkers Kwan Ching; Lee, Jessica Hiu Toon; Zhao, Yue; Lu, Qi; Yang, Shulan; Hui, Vivian Chi Ching			Exploring Older Adults' Perspectives and Acceptance of AI-Driven Health Technologies: Qualitative Study	JMIR AGING																	YANG, SHULAN/HMP-4874-2023; Wong, Arkers/N-6253-2017	Wong, Arkers/0000-0001-6708-3099; Hui, Chi Ching Vivian/0000-0003-1966-6139														2561-7605					2025	8
J	Córdova, P; Grájeda, A; Córdova, JP; Vargas-Sánchez, A; Burgos, J; Sanjinés, A				Cordova, Pamela; Grajeda, Alberto; Cordova, Juan Pablo; Vargas-Sanchez, Alejandro; Burgos, Johnny; Sanjines, Alberto			Leveraging AI tools in finance education: exploring student perceptions, emotional reactions and educator experiences	COGENT EDUCATION																	CORDOVA, PAMELA/JHT-8113-2023; Grajeda, Alberto/GYV-4241-2022; Sanyal, Rajib Kumar/LGY-2088-2024	CORDOVA OLIVERA, PAMELA/0000-0002-8644-3157; Cordova Olivera, Juan Pablo/0009-0007-0366-5525; Grajeda, Alberto/0000-0003-2515-6944; Sanyal, Rajib Kumar/0000-0002-4848-6682													2331-186X					DEC 31	2024	11	1
J	Qi, X; Wu, B				Qi, X.; Wu, B.			AI's Role in Improving Social Connection and Oral Health for Older Adults: A Synergistic Approach	JDR CLINICAL & TRANSLATIONAL RESEARCH																	Qi, Xiang/GSI-9385-2022	Qi, Xiang/0000-0003-3958-8609													2380-0844	2380-0852				JUL	2024	9	3
J	Sun, HC; Liu, YF; Al-Tahmeesschi, A; Nag, A; Soleimanpour, M; Canberk, B; Arslan, H; Ahmadi, H				Sun, Haochen; Liu, Yifan; Al-Tahmeesschi, Ahmed; Nag, Avishek; Soleimanpour, Mohadeseh; Canberk, Berk; Arslan, Huseyin; Ahmadi, Hamed			Advancing 6G: Survey for Explainable AI on Communications and Network Slicing	IEEE OPEN JOURNAL OF THE COMMUNICATIONS SOCIETY																	ahmadi, hamed/AAM-5525-2020; Nag, Avishek/T-9268-2019; Arslan, Huseyin/ABI-3865-2020; Canberk, Berk/K-3422-2014	ahmadi, hamed/0000-0001-5508-8757; Nag, Avishek/0000-0003-1702-1492; Canberk, Berk/0000-0001-6472-1737														2644-125X					2025	6
J	Mascarenhas, M; Martins, M; Afonso, J; Ribeiro, T; Cardoso, P; Mendes, F; Andrade, P; Cardoso, H; Ferreira, J; Macedo, G				Mascarenhas, Miguel; Martins, Miguel; Afonso, Joao; Ribeiro, Tiago; Cardoso, Pedro; Mendes, Francisco; Andrade, Patricia; Cardoso, Helder; Ferreira, Joao; Macedo, Guilherme			The Future of Minimally Invasive Capsule Panendoscopy: Robotic Precision, Wireless Imaging and AI-Driven Insights	CANCERS																	Afonso, Joao/GPC-5702-2022; Macedo, Manuel/L-8038-2013; Mascarenhas, Miguel/GQP-8202-2022; Ferreira, Joao Pedro/G-9796-2016	Mascarenhas, Miguel/0000-0002-0340-0830; Mendes, Francisco/0000-0002-5890-7049; Macedo, Guilherme/0000-0002-9387-9872; Ferreira, Joao Pedro/0000-0003-4310-2915; Martins, Miguel/0000-0002-0484-4804														2072-6694				DEC	2023	15	24
J	Mougiakou, E; Papadimitriou, S; Chrysafiadi, K; Virvou, M				Mougiakou, Eirini; Papadimitriou, Spyros; Chrysafiadi, Konstantina; Virvou, Maria			Artificial intelligence in educational games and consent under general data protection regulation	INTELLIGENT DECISION TECHNOLOGIES-NETHERLANDS																															1872-4981	1875-8843				2025 MAR 18	2025
J	Giansanti, D; Pirrera, A				Giansanti, Daniele; Pirrera, Antonia			Integrating AI and Assistive Technologies in Healthcare: Insights from a Narrative Review of Reviews	HEALTHCARE																	GIANSANTI, DANIELE/IWL-9175-2023; Pirrera, Antonia/F-6971-2019	Pirrera, Antonia/0000-0002-0215-4842														2227-9032				MAR	2025	13	5
J	Belbase, P; Bhusal, R; Ghimire, SS; Sharma, S; Banskota, B				Belbase, Poshan; Bhusal, Rajan; Ghimire, Sapana Sharma; Sharma, Shreesti; Banskota, Bibek			Assuring assistance to healthcare and medicine: Internet of Things, Artificial Intelligence, and Artificial Intelligence of Things	FRONTIERS IN ARTIFICIAL INTELLIGENCE																		Belbase, Poshan/0009-0006-1100-624X; Bhusal, Rajan/0000-0002-0808-7476														2624-8212				DEC 13	2024	7
J	Nadian-Ghomsheh, A; Farahani, B; Kavian, M				Nadian-Ghomsheh, Ali; Farahani, Bahar; Kavian, Mohammad			A hierarchical privacy-preserving IoT architecture for vision-based hand rehabilitation assessment	MULTIMEDIA TOOLS AND APPLICATIONS																		Nadian-Ghomsheh, Ali/0000-0002-2215-409X; Farahani, Bahar/0000-0002-7016-6853													1380-7501	1573-7721				AUG	2021	80	20
J	Maleki, SF; Yousefi, M; Afshar, S; Pedrammehr, S; Lim, CP; Jafarizadeh, A; Asadi, H				Maleki, Shadi Farabi; Yousefi, Milad; Afshar, Sayeh; Pedrammehr, Siamak; Lim, Chee Peng; Jafarizadeh, Ali; Asadi, Houshyar			Artificial Intelligence for Multiple Sclerosis Management Using Retinal Images: Pearl, Peaks, and Pitfalls	SEMINARS IN OPHTHALMOLOGY																	Farabi Maleki, Shadi/KIJ-8428-2024; Yousefi, Milad/KEI-1801-2024; Lim, Chee/AAS-4698-2021; Lim, CP/D-1999-2009; Jafarizadeh, Ali/ISB-5229-2023; Pedrammehr, Siamak/V-3301-2017	Asadi, Houshyar/0000-0002-3620-8693; Lim, CP/0000-0003-4191-9083; Yousefi, Milad/0009-0006-5790-5144; Jafarizadeh, Ali/0000-0003-4922-1923; Pedrammehr, Siamak/0000-0002-2974-1801													0882-0538	1744-5205				MAY 18	2024	39	4
J	Wei, J; Qi, S; Wang, WJ; Jiang, LY; Gao, HH; Zhao, F; Al-Bukhaiti, K; Wan, AP				Wei, Jian; Qi, Sun; Wang, Wanjiang; Jiang, Liuyan; Gao, Huihui; Zhao, Feng; Al-Bukhaiti, Khalil; Wan, Anping			Decision-Making in the Age of AI: A Review of Theoretical Frameworks, Computational Tools, and Human-Machine Collaboration	CONTEMPORARY MATHEMATICS																															2705-1064	2705-1056					2025	6	2
J	Kueper, JK; Terry, A; Bahniwal, R; Meredith, L; Beleno, R; Brown, JB; Dang, J; Leger, D; McKay, S; Pinto, A; Ryan, BL; Zwarenstein, M; Lizotte, DJ				Kueper, Jacqueline K.; Terry, Amanda; Bahniwal, Ravninder; Meredith, Leslie; Beleno, Ron; Brown, Judith Belle; Dang, Janet; Leger, Daniel; McKay, Scott; Pinto, Andrew; Ryan, Bridget L.; Zwarenstein, Merrick; Lizotte, Daniel J.			Connecting artificial intelligence and primary care challenges: findings from a multi stakeholder collaborative consultation	BMJ HEALTH & CARE INFORMATICS																	Mencarelli, Maria Antonietta/AAC-5615-2022; Lizotte, Daniel/AAT-3170-2020; Terry, Amanda/H-4286-2019; Zwarenstein, Merrick/P-5210-2014	Kueper, Jacqueline/0000-0002-6690-1552; Pinto, Andrew/0000-0003-1841-9347; Zwarenstein, Merrick/0000-0003-0162-7027; McKay, Scott Douglas/0009-0001-8959-4487; Brown, Judith Belle/0000-0002-3661-9361; Lizotte, Daniel/0000-0002-9258-8619; Ryan, Bridget/0000-0001-9080-5635; Terry, Amanda L./0000-0002-8157-8298; Meredith, Leslie/0009-0007-1338-6474														2632-1009				JAN	2022	29	1
J	Alnaimat, F; Al-Halaseh, S; Alsamhori, ARF				Alnaimat, Fatima; Al-Halaseh, Salameh; Alsamhori, Abdel Rahman Feras			Evolution of Research Reporting Standards: Adapting to the Influence of Artificial Intelligence, Statistics Software, and Writing Tools	JOURNAL OF KOREAN MEDICAL SCIENCE																	Alnaimat, Fatima/AAQ-9321-2020	Samhouri, Abdelrahman/0000-0002-2715-4320; Al-Halaseh, Salameh/0000-0002-2623-6885; Alnaimat, Fatima/0000-0002-5574-2939													1011-8934	1598-6357				AUG 19	2024	39	32
J	Alkhodair, M; Alkhudhayr, H				Alkhodair, Majid; Alkhudhayr, Hanadi			Harnessing Industry 4.0 for SMEs: Advancing Smart Manufacturing and Logistics for Sustainable Supply Chains	SUSTAINABILITY																	Alkhudhayr, Hanadi/GWQ-9039-2022															2071-1050				FEB	2025	17	3
J	Araújo, VM; Rili, I; Gisiger, T; Gambs, S; Vasseur, E; Cellier, M; Diallo, AB				Araujo, Voncarlos M.; Rili, Ines; Gisiger, Thomas; Gambs, Sebastien; Vasseur, Elsa; Cellier, Marjorie; Diallo, Abdoulaye Banire			AI-powered cow detection in complex farm environments	SMART AGRICULTURAL TECHNOLOGY																		de araujo, voncarlos/0000-0002-7103-6882; Cellier, Marjorie/0000-0002-4825-3707													2772-3755					MAR	2025	10
J	Borger, JG; Ng, AP; Anderton, H; Ashdown, GW; Auld, M; Blewitt, ME; Brown, D; Call, MJ; Collins, P; Freytag, S; Harrison, LC; Hesping, E; Hoysted, J; Johnston, A; Mcinneny, A; Tang, P; Whitehead, L; Jex, A; Naik, SH				Borger, Jessica G.; Ng, Ashley P.; Anderton, Holly; Ashdown, George W.; Auld, Megan; Blewitt, Marnie E.; Brown, Daniel, V; Call, Melissa J.; Collins, Peter; Freytag, Saskia; Harrison, Leonard C.; Hesping, Eva; Hoysted, Jaci; Johnston, Anna; Mcinneny, Andrew; Tang, Phil; Whitehead, Lachlan; Jex, Aaron; Naik, Shalin H.			Artificial intelligence takes center stage: exploring the capabilities and implications of ChatGPT and other AI-assisted technologies in scientific research and education	IMMUNOLOGY AND CELL BIOLOGY																	Jex, Aaron/AGZ-7897-2022; Call, Melissa/HHZ-6671-2022; Borger, Jessica/I-4053-2019; Blewitt, Marnie/B-1796-2012; Ng, Ashley/D-3842-2011; Jex, Aaron/A-7421-2019	Ng, Ashley/0000-0001-9690-0879; Jex, Aaron/0000-0002-1285-7947; Borger, Jessica/0000-0003-0704-1254; Freytag, Saskia/0000-0002-2185-7068; Hesping, Eva/0000-0002-9012-5725; Brown, Daniel/0000-0002-3594-5851													0818-9641	1440-1711				NOV	2023	101	10
J	Peñaranda, NR; Eissa, A; Ferretti, S; Bianchi, G; Di Bari, S; Farinha, R; Piazza, P; Checcucci, E; Belenchón, IR; Veccia, A; Rivas, JG; Taratkin, M; Kowalewski, KF; Rodler, S; De Backer, P; Cacciamani, GE; De Groote, R; Gallagher, AG; Mottrie, A; Micali, S; Puliatti, S; YAU Uro Technol Working Grp				Penaranda, Natali Rodriguez; Eissa, Ahmed; Ferretti, Stefania; Bianchi, Giampaolo; Di Bari, Stefano; Farinha, Rui; Piazza, Pietro; Checcucci, Enrico; Belenchon, Ines Rivero; Veccia, Alessandro; Gomez Rivas, Juan; Taratkin, Mark; Kowalewski, Karl-Friedrich; Rodler, Severin; De Backer, Pieter; Cacciamani, Giovanni Enrico; De Groote, Ruben; Gallagher, Anthony G.; Mottrie, Alexandre; Micali, Salvator…			Artificial Intelligence in Surgical Training for Kidney Cancer: A Systematic Review of the Literature	DIAGNOSTICS																	Puliatti, Stefano/AAS-8339-2021; Eissa, Ahmed/K-2328-2019; Micali, Salvatore/J-8179-2016; Piazza, Pietro/AAP-4467-2021; Checcucci, Enrico/AAF-2124-2019; Taratkin, Mark/ABD-5311-2021; Rodriguez Peñaranda, Natali/LRC-9282-2024; Rodler, Severin/AAC-6015-2022; cacciamani, giovanni/ABT-9931-2022; Gomez Rivas, Juan/H-1635-2013	Eissa, Ahmed/0000-0001-6817-6887; Checcucci, Enrico/0000-0001-7901-5608; Gomez Rivas, Juan/0000-0002-0556-3035; Rodriguez Penaranda, Natali/0009-0006-3057-3805; Rodler, Severin/0000-0002-7600-6535; Veccia, Alessandro/0000-0001-5947-3206; Cacciamani, Giovanni/0000-0002-8892-5539; Piazza, Pietro/0000-0002-6740-534X; Di Bari, Stefano/0000-0003-1635-7226; De Backer, Pieter/0000-0002-9375-2353; Puliat…														2075-4418				OCT	2023	13	19
J	Singhal, A; Neveditsin, N; Tanveer, H; Mago, V				Singhal, Aditya; Neveditsin, Nikita; Tanveer, Hasnaat; Mago, Vijay			Toward Fairness, Accountability, Transparency, and Ethics in AI for Social Media and Health Care: Scoping Review	JMIR MEDICAL INFORMATICS																	Mago, Vijay/AAC-6646-2019	Mago, Vijay/0000-0002-9741-3463; Tanveer, Hasnaat/0009-0001-0171-7957; Singhal, Aditya/0000-0001-9634-4075; Neveditsin, Nikita/0009-0000-9859-3905														2291-9694					2024	12
J	Miskeen, E; Alfaifi, J; Alhuian, DM; Alghamdi, M; Alharthi, MH; Alshahrani, NA; Alosaimi, G; Alshomrani, RA; Hajlaa, AM; Khair, NM; Almuawi, AM; Al-Jaber, KH; Elrasheed, FE; Elhassan, K; Abbas, M				Miskeen, Elhadi; Alfaifi, Jaber; Alhuian, Dalal Mohammed; Alghamdi, Mushabab; Alharthi, Muffarah Hamid; Alshahrani, Nourah Abdullah; Alosaimi, Ghala; Alshomrani, Raydaa Abdullah; Hajlaa, Abdullah Mohammed; Khair, Nadir Mohammed; Almuawi, Abdullah Mohammed; Al-Jaber, Khalifa Haytham; Elrasheed, Fath Elrahman; Elhassan, Kamal; Abbas, Mohammed			Prospective Applications of Artificial Intelligence In Fetal Medicine: A Scoping Review of Recent Updates	INTERNATIONAL JOURNAL OF GENERAL MEDICINE																	Jaber, Alfaifi/JVO-8988-2024; ELRASHEED, FATH/LNQ-9097-2024; alghamdi, Mushabab/AGR-6297-2022; Miskeen, Elhadi/T-7856-2019	Alshomrani, Raydaa/0009-0009-0836-8903; Alfaifi, Jaber/0000-0002-4507-3970; Miskeen, Elhadi/0000-0001-6853-3004														1178-7074					2025	18
J	Kumar, M; Jha, B; Gupta, G; Ranjan, S				Kumar, Manish; Jha, Babita; Gupta, Gaurav; Ranjan, Shiv			Bibliometric analysis of AI and Fintech: Mapping the intersection of artificial intelligence and financial technologies	INTERNATIONAL JOURNAL OF FINANCIAL ENGINEERING																	; , Gaurav/AAI-8975-2021; Jha, Babita/GOP-2986-2022	Kumar, Manish/0000-0002-7537-0538; RANJAN, SHIV/0000-0002-7591-4443; , Gaurav/0000-0003-1507-1357; Jha, Babita/0000-0001-8586-0250													2424-7863	2424-7944				DEC	2024	11	4
J	Reer, A; Wiebe, A; Wang, X; Rieger, JW				Reer, Aaron; Wiebe, Andreas; Wang, Xu; Rieger, Jochem W.			FAIR human neuroscientific data sharing to advance AI driven research and applications: Legal frameworks and missing metadata standards	FRONTIERS IN GENETICS																		Rieger, Jochem/0000-0003-0955-2306														1664-8021				MAR 13	2023	14
J	Okada, A; Sherborne, T; Panselinas, G; Kolionis, G				Okada, Alexandra; Sherborne, Tony; Panselinas, Giorgos; Kolionis, Georgios			Fostering Transversal Skills Through Open Schooling Supported by the CARE-KNOW-DO Pedagogical Model and the UNESCO AI Competencies Framework	INTERNATIONAL JOURNAL OF ARTIFICIAL INTELLIGENCE IN EDUCATION																															1560-4292	1560-4306				2025 MAR 5	2025
C	Clear, T; Cajander, Å; Clear, A; McDermott, R; Daniels, M; Divitini, M; Forshaw, M; Humble, N; Kasinidou, M; Kleanthous, S; Kultur, C; Parvini, G; Polash, M; Zhu, TT			ASSOC COMPUTING MACHINERY	Clear, Tony; Cajander, Asa; Clear, Alison; McDermott, Roger; Daniels, Mats; Divitini, Monica; Forshaw, Matthew; Humble, Niklas; Kasinidou, Maria; Kleanthous, Styliani; Kultur, Can; Parvini, Ghazaleh; Polash, Mohammad; Zhu, Tingting			AI Integration in the IT Professional Workplace: A Scoping Review and Interview Study with Implications for Education and Professional Competencies	2024 WORKING GROUP REPORTS ON INNOVATION AND TECHNOLOGY IN COMPUTER SCIENCE EDUCATION, ITICSE WGR 2024					29th Annual Conference on Innovation and Technology in Computer Science Education (ITiCSE)	JUL 08-10, 2024	Univ Milano, Milan, ITALY	Assoc Comp Machinery,Assoc Comp Machinery Special Interest Grp Comp Sci Educ,ACM Europe Council,Informat Europe,Github Educ,Univ Milano, Dipartimento Informatica	Univ Milano								Polash, Mohammad/LEM-4145-2024; Clear, Tony/F-4003-2011																979-8-4007-1208-1				2024
J	Taddese, AA; Addis, AC; Tam, BT				Taddese, Asefa Adimasu; Addis, Assefa Chekole; Tam, Bjorn T.			Data stewardship and curation practices in AI-based genomics and automated microscopy image analysis for high-throughput screening studies: promoting robust and ethical AI applications	HUMAN GENOMICS																	Adimasu, Taddese/LFR-6525-2024	Tam, Bjorn T./0000-0001-6740-8674													1473-9542	1479-7364				FEB 23	2025	19	1
J	Oliveira, JA; Eskandar, K; Kar, E; de Oliveira, FR; da Silva, AL				Oliveira, Juliana Almeida; Eskandar, Karine; Kar, Emre; de Oliveira, Flavia Ribeiro; da Silva Filho, Agnaldo Lopes			Understanding AI's Role in Endometriosis Patient Education and Evaluating Its Information and Accuracy: Systematic Review	JMIR AI																	Oliveira, Flávia/ABG-6084-2021; Oliveira, Juliana/CAG-1260-2022; Kar, Emre/AAB-6338-2020	Vieira Queiroz Almeida, Juliana/0000-0002-4704-2318; Kar, Emre/0000-0002-5562-9258; Eskandar, Karine/0009-0003-2329-8575														2817-1705					2024	3
J	Al-Zubaidi, SM; Shaikh, GM; Malik, A; Abideen, MZU; Tareen, J; Alzahrani, NSA; Siddiqui, AA				Al-Zubaidi, Saad M.; Shaikh, Gul Muhammad; Malik, Asma; Abideen, Malik Zain Ul; Tareen, Jawad; Alzahrani, Nada Saeed A.; Siddiqui, Ammar Ahmed			Exploring Faculty Preparedness for Artificial Intelligence-Driven Dental Education: A Multicentre Study	CUREUS JOURNAL OF MEDICAL SCIENCE																	Al-Zubaidi, Saad/GVT-8014-2022; Siddiqui, Dr. Ammar Ahmed/M-3442-2015; Zain Ul Abideen, Malik/JYO-7187-2024	Siddiqui, Dr. Ammar Ahmed/0000-0002-8816-6421; Zain Ul Abideen, Malik/0009-0000-9465-7166														2168-8184				JUL 11	2024	16	7
J	Dhopte, A; Bagde, H				Dhopte, Ashwini; Bagde, Hiroj			Smart Smile: Revolutionizing Dentistry With Artificial Intelligence	CUREUS JOURNAL OF MEDICAL SCIENCE																	Dhopte, Ashwini/IVH-5690-2023; Bagde, Hiroj/ADG-8958-2022															2168-8184				JUN 30	2023	15	6
C	Duraes, D; Bezerra, R; Novais, P			IEEE	Duraes, Dalila; Bezerra, Rita; Novais, Paulo			AI-Driven Educational Transformation in Secondary Schools: Leveraging Data Insights for Inclusive Learning Environments	2024 IEEE GLOBAL ENGINEERING EDUCATION CONFERENCE, EDUCON 2024	IEEE Global Engineering Education Conference				15th IEEE Global Engineering Education Conference (IEEE EDUCON)	MAY 08-11, 2024	GREECE	IEEE,Univ Piraeus Res Ctr,Aristotle Univ Thessaloniki,Univ W Attica,MathWorks,IEEE Educ Soc,Comp Log,Aegean Airlines,Avance Car Rental,Binarylogic,IEEE Try Engn									Machado, José/B-5887-2009; Duraes, Dalila/M-6704-2016														2165-9559		979-8-3503-9402-3; 979-8-3503-9403-0				2024
J	Arranz-García, O; García, MDR; Alonso-Secades, V				Arranz-Garcia, Olga; Garcia, Maria del Carmen Romero; Alonso-Secades, Vidal			PERCEPTIONS, STRATEGIES, AND CHALLENGES OF TEACHERS IN THE INTEGRATION OF ARTIFICIAL INTELLIGENCE IN PRIMARY EDUCATION: A SYSTEMATIC REVIEW	JOURNAL OF INFORMATION TECHNOLOGY EDUCATION-RESEARCH																	Arranz-Garcia, Olga/C-3236-2016														1547-9714	1539-3585					2025	24
J	Xin, X; Wu, SS; Xu, HL; Ma, YJ; Bao, N; Gao, M; Han, X; Gao, S; Zhang, SW; Zhao, XY; Qi, JR; Zhang, XD; Tan, JC				Xin, Xing; Wu, Shanshan; Xu, Heli; Ma, Yujiu; Bao, Nan; Gao, Man; Han, Xue; Gao, Shan; Zhang, Siwen; Zhao, Xinyang; Qi, Jiarui; Zhang, Xudong; Tan, Jichun			Non-invasive prediction of human embryonic ploidy using artificial intelligence: a systematic review and meta-analysis	ECLINICALMEDICINE																	Siwen, Zhang/KVB-1729-2024; xin, xing/LKM-4872-2024; Tan, Jichun/AAE-7476-2020	ma, yu jiu/0000-0002-7217-4611														2589-5370				NOV	2024	77
[truncated: 22 more columns]
